1 **Bias toward long gene misregulation in synaptic disorders can be an artefact of amplification-based**  
2 **methods**

3 Ayush T. Raman<sup>1,2,8</sup>, Amy E. Pohodich<sup>2,3,8</sup>, Ying-Wooi Wan<sup>2,4</sup>, Hari Krishna Yalamanchili<sup>2,4</sup>,  
4 Bill Lowry<sup>5</sup>, Huda Y. Zoghbi<sup>2,3,4,6,\*</sup>, Zhandong Liu<sup>1,2,7,9,\*</sup>

5  
6 <sup>1</sup>Graduate Program in Quantitative and Computational Biosciences, Baylor College of Medicine,  
7 Houston, TX 77030, USA; <sup>2</sup>Jan and Dan Duncan Neurological Research Institute at Texas Children's  
8 Hospital, Houston, Texas 77030, USA; <sup>3</sup>Department of Neuroscience, Baylor College of Medicine,  
9 Houston, Texas 77030, USA; <sup>4</sup>Department of Molecular and Human Genetics, Baylor College of  
10 Medicine, Houston, Texas 77030, USA; <sup>5</sup>Department of Molecular, Cell and Developmental Biology,  
11 University of California, Los Angeles, Los Angeles, CA 90095, USA; <sup>6</sup>Howard Hughes Medical Institute,  
12 Baylor College of Medicine, Houston, Texas 77030, USA; <sup>7</sup>Department of Pediatrics, Section of  
13 Neurology, Baylor College of Medicine, Houston, TX, USA. <sup>8</sup>These authors contributed equally to this  
14 work. <sup>9</sup>Lead Contact. \*Co-Corresponding Authors: Z.L. ([zhandong.liu@bcm.edu](mailto:zhandong.liu@bcm.edu)) and H.Y.Z.  
15 ([hzoghbi@bcm.edu](mailto:hzoghbi@bcm.edu)).

16  
17  
18  
19  
20  
21  
22

Keywords: Long gene misregulation bias, *MECP2*, transcriptome profiling, microarray, RNA-sequencing,  
Nanostring

23 **SUMMARY**

24           Several recent studies have suggested that genes that are longer than 100 kilobases are more  
25 likely to be misregulated in neurological diseases associated with synaptic dysfunction, such as autism  
26 and Rett syndrome. These length-dependent transcriptional changes are modest in *Mecp2*-mutant  
27 samples, but, given the low sensitivity of high-throughput transcriptome profiling technology, the  
28 statistical significance of these results needs to be re-evaluated. Here, we show that the apparent length-  
29 dependent trends previously observed in MeCP2 microarray and RNA-Sequencing datasets, particularly  
30 in genes with low fold-changes, disappeared after accounting for baseline variability estimated from  
31 randomized control samples. As we found no similar bias with NanoString technology, this long-gene  
32 bias seems to be particular to PCR amplification-based platforms. In contrast, authentic long gene effects,  
33 such as those caused by topoisomerase inhibition, can be detected even after adjustment for baseline  
34 variability. Accurate detection of length-dependent trends requires establishing a baseline from  
35 randomized control samples.

36  
37  
38

39 **HIGHLIGHTS**

- 40 • Length-dependent gene misregulation is not intrinsic to *Mecp2* disruption.  
41 • Topoisomerase inhibition produces an authentic long gene bias.  
42 • PCR amplification-based high-throughput datasets are biased toward long genes.

43  
44  
45  
46  
47  
48  
49  
50  
51  
52  
53  
54

## 55 INTRODUCTION

56 The capacity for large-scale analysis of transcriptional changes in human disease has attracted  
57 considerable research attention, most recently in studies related to autism spectrum disorders, including  
58 Angelman syndrome, Rett syndrome (RTT), Fragile X syndrome, and autism itself (Zoghbi and Bear,  
59 2012). Microarray and RNA-Seq studies have demonstrated that these disorders involve the dysregulation  
60 of thousands of neuronal genes. Several recent studies have also suggested that the genes dysregulated in  
61 these syndromes tend to be those that consist of more than 100 kilobases (Katz et al., 2016; Zylka et al.,  
62 2015). This intriguing length bias has been observed across both epigenetic and transcriptional datasets  
63 such as Angelman syndrome (Huang et al., 2011), Rett syndrome (Gabel et al., 2015; Kinde et al., 2016;  
64 Sugino et al., 2014), Fragile X syndrome (Gabel et al., 2015; Ouwenga and Dougherty, 2015) autism  
65 (King et al., 2013; Sullivan et al., 2015). The degree of bias tends to be fairly mild, however, long genes  
66 are themselves overrepresented in the brain compared to other tissues in the body (Zylka et al., 2015). It  
67 seems worthwhile to examine this apparent bias more closely in gene expression datasets.

68 The afore-mentioned gene expression studies (Gabel et al., 2015; King et al., 2013; Sugino et al.,  
69 2014; Sullivan et al., 2015) partitioned the entire genome into hundreds of overlapping bins (or windows),  
70 with each bin containing hundreds of genes. Within each bin, the average fold-change in wildtype or  
71 untreated brain tissue was compared to that observed in the knock-out or treatment groups, and a running  
72 average  $\log_2$  fold-change was plotted against the average gene length. In these running average plots, long  
73 genes demonstrated a non-zero mean compared to short genes. These analyses did not, however, establish  
74 a baseline of inherent variation among samples within a given genotype, and they did not employ a  
75 statistical test to determine the significance of the length-dependent changes. It should be noted that  
76 variations in measured gene expression can arise because of RNA priming (Hansen et al., 2010; Li et al.,  
77 2010), GC-content (Risso et al., 2011), transcript length (Oshlack and Wakefield, 2009), or library  
78 preparation (Lahens et al., 2014), all of which must be accounted for in order to avoid unwarranted  
79 biological conclusions (Robert and Watson, 2015; Wan et al., 2014).

80 We, therefore, analysed a comprehensive list of large datasets derived from different  
81 transcriptome profiling technologies and set out to determine the best way to enhance the signal-to-noise  
82 ratio. To this end, we began by analysing technical replicates using benchmark datasets. Using these  
83 datasets, we developed an approach to reliably identify patterns with respect to gene regulation, and we  
84 then applied our approach to analyse datasets for which long gene trends have been reported.

85  
86  
87  
88

## 89 RESULTS

90

### 91 **Baseline length dependency should first be estimated from the control groups: the Topotecan study** 92 **as a positive control**

93 Preferential dysregulation of long genes is generally estimated by computing the average gene  
94 expression fold-changes between experimental groups and plotting this fold-change against the gene  
95 length (Gabel et al., 2015; King et al., 2013; Sugino et al., 2014), also known as running average plots  
96 (red curve in Fig 1A, Experimental Procedures). However, the statistical significance of running average  
97 plots has never been evaluated in the current literature. Here, we propose an approach to estimate  
98 statistical significance by constructing a null distribution of the running average plot from randomized  
99 control samples (Figure S1).

100 The first data that we analyzed were those from a study that evaluated transcriptional effects of  
101 the topoisomerase 1 inhibitor topotecan in autism (King et al., 2013). When we constructed a running  
102 average plot comparing the gene expression changes between topotecan drug-treated neurons (drug or D)  
103 and vehicle-treated cortical neurons (vehicle or V), we observed a preferential downregulation of long  
104 genes (the running average plot comparing drug vs. vehicle is indicated by the red curve in Figure 1A;  
105 Figure S1). To estimate the baseline variation among control samples, two random sets of vehicle-treated  
106 cultured cortical neurons were compared to each other (blue curve in Fig 1A, Experimental Procedures).  
107 Given that these untreated samples were obtained from littermates, we did not expect to observe any  
108 differences in gene expression and predicted that a running average plot comparing gene expression  
109 between vehicle-treated control samples would yield a horizontal line through  $y=0$ . However, we found  
110 that genes over 100kb in length tended to be down-regulated on average (blue curve in Figure 1A) when  
111 gene expression levels between control samples are compared. This effect was found for both RNA-Seq  
112 and microarray datasets (Figure 1A) and indicates that a portion of the length-dependent trend observed in  
113 the topotecan datasets is due to a length-dependent bias (i.e. noise) that can be observed even in the  
114 control samples.

115 To determine the significance of average fold-change trends, we applied a Student's t-test to each  
116 of the matching data bins from the drug vs. vehicle (D/V) and vehicle vs. vehicle (V/V) comparisons,  
117 followed by an adjustment for multiple hypothesis testing. For consistency, these plots are referred to as  
118 overlap plots (Experimental Procedures, Figure S1). At a false discovery rate of 0.05, only the long gene  
119 bins were statistically significant and showed preferential downregulation following topotecan treatment  
120 in both RNA-Seq and microarray datasets (lower panel in Fig 1A, red dots indicate statistically significant  
121 bins; Figure S1). In other words, although the control samples showed that long genes are downregulated  
122 at baseline (i.e. when comparing controls to controls), topotecan treatment produced an even stronger

123 downregulation of long genes, providing sufficient signal to overcome the noise (or intra sample  
124 variation) observed in long genes at baseline. These datasets enabled us to establish a statistical procedure  
125 as well as provided positive control for further analyses of long gene trends (King et al., 2013; Mabb et  
126 al., 2016) in other studies.

127

### 128 **Gene length trends do not hold up in datasets for MeCP2 mouse models**

129 Studies of MeCP2-related disorders—both Rett syndrome (caused by loss-of-function mutations  
130 in *MECP2*) and *MECP2* duplication syndrome (caused by duplication or even triplication of the locus)—  
131 have provided a wealth of transcriptome data. Experiments in mouse models of both syndromes have  
132 suggested that loss of MeCP2 function causes preferential upregulation of long genes and, conversely,  
133 that gain of MeCP2 function leads to preferential downregulation of long genes (Gabel et al., 2015). We  
134 chose to delve deeper into these datasets to explore the extent of the contribution of long genes to RTT  
135 pathology. We applied our method to eleven MeCP2 datasets (Table 2) across seventeen different tissue  
136 types (Baker et al., 2013; Ben-Shachar et al., 2009; Chahrour et al., 2008; Chen et al., 2015; Gabel et al.,  
137 2015; Kishi et al., 2016; Samaco et al., 2012; Sugino et al., 2014; Zhao et al., 2013). We first computed  
138 the running average plots and were able to reproduce the same results as reported previously (Gabel et al.,  
139 2015; Sugino et al., 2014). However, when the baseline variation between wild-type (WT) samples is  
140 plotted (blue curves in Fig. 1B), they extensively overlap with the running average plots from the *Mecp2*-  
141 null (KO) samples (red curves in Fig. 1B; see also Figures S2A-K). This overlap between the curves for  
142 the WT vs. WT comparisons and the KO vs. WT comparisons indicates that the signal originally reported  
143 for the KO vs. WT comparison can be largely explained by noise (or intra-sample variation) in the  
144 dataset, as there is not a clear separation between the WT vs. WT curves and the KO vs. WT curves in  
145 most brain regions surveyed.

146 A few long gene bins showed significant preferential upregulation in *Mecp2*-null mice ( $FDR <$   
147  $0.05$ ) in these datasets. For example, in hypothalamus dataset, we found 12 bins of long genes to be  
148 significant (Figures 1B, right panel). However, we observed a similar or even larger number of  
149 significant bins for genes less than 100k (Figures 1B-1C; see also Figures S2B-S2C, S2F-S2G, and S2J).  
150 Likewise, no preferential repression of long genes was observed for datasets from *Mecp2*-overexpression  
151 models (Tg) (Figure 1C; see also Figure S2L). Indeed, we found more short genes to be preferentially  
152 dysregulated in the *Mecp2*-overexpression models (Figure 1C). Thus, when assessing the bins of genes  
153 with the significant difference in expression between WT and KO mice, we found that genes with a  
154 variety of lengths were altered in KO and Tg mice. Additionally, while there are certainly some long  
155 genes with significantly altered expression in both KO and Tg mice, there is no consistent and preferential  
156 long gene trend observed in the *Mecp2* datasets.

## 157 **Long gene trend is not present in Nuclear RNA profiles of MeCP2 mouse models**

158 A recent study reported that transcripts of long genes were downregulated in nuclear and nascent  
159 RNA samples (Johnson et al., 2017) in contrast to previous studies (Gabel et al., 2015; Sugino et al.,  
160 2014). The dataset was generated by combining an *in vivo* biotinylation system with Cre-loxP technology  
161 that circumvented cellular heterogeneity of the brain and helped examine transcriptomic changes due to  
162 MeCP2 in specific cell types, in both male and female mice (Johnson et al., 2017). The samples were  
163 derived from the cortical cells of *Mecp2*-mutant mice bearing either of two common Rett-causing  
164 mutations: T158M or R106W, which are among the most common mutations found in RTT patients  
165 (Cuddapah et al., 2014).

166 We reanalyzed the data using overlap plots and observed no significant downregulation of long  
167 genes in wildtype or *Mecp2*-mutant excitatory neurons from 18-week old T158M or R106W female mice  
168 (Figures 1D and S4E). In excitatory neurons bearing the R106W mutation, we observed few bins that are  
169 significantly different from WT expression levels. Notably, bins with significant gene expression changes  
170 were not due to the downregulation of long genes in mutant samples. Rather, these bins were significant  
171 due to the downregulation of long genes in control (WT) samples, as indicated by the downward slopes of  
172 the running average plots comparing WT vs. WT samples (blue lines in Figures 1D and S4E). Similarly,  
173 we observed no significant repression of long genes in nuclear RNA-Seq datasets of excitatory and  
174 inhibitory neurons from 6-week old male mice with the same mutation type (Figures S4A-S4D). Finally,  
175 when we examined downregulation of long genes from the GRO-Seq (global nuclear run-on with high-  
176 throughput sequencing) data collected from these mice, we confirmed a marginal significance in the  
177 downregulation of long genes (Figure S3A), but upregulation of long genes was not observed in whole  
178 cell RNA-Seq data (Figure S3B). These results suggest that the transcriptome changes in long genes that  
179 appear in RNA isolation-based methods are independent of the sex, age, or mutation type of the mouse.

180 Together, these results suggest that when the fold-change difference is 50% or more, as it is in the  
181 topotecan datasets, there is likely to be a genuine long gene bias. When the fold-change effect is small  
182 (<15%), however, as it is with the long genes observed in the *Mecp2* datasets, it is more likely that the  
183 observed long gene trend is due to inherent variation among samples. The reported long gene trend in the  
184 *Mecp2* datasets is in the same range as the noise that we derived from the intra-sample comparison in the  
185 control groups, and this effect was seen in all the *Mecp2* datasets that we assessed. This further suggests  
186 that the length-dependent variability estimated from microarray and RNA-Seq platforms is not sensitive  
187 enough to capture small transcriptional changes. We, therefore, recommend that baseline gene length  
188 dependency should be evaluated from the control group first to understand the statistical significance of  
189 observed long gene trends in any sequencing dataset.

190

## 191 **Human MeCP2 datasets: the importance of age**

192 To determine whether preferential dysregulation of long genes occurs in *in vitro* human Rett  
193 datasets, we computed overlap plots on samples from isogenic human iPSCs (hiPSCs), neural progenitor  
194 cells (NPCs), and neurons from the fibroblasts of two independent patients, with and without the *MECP2*  
195 mutation. We found no preferential upregulation of long genes (Figures 2A) but did see a trend toward  
196 downregulation of long genes among human *in vitro* RTT neuron samples, which is contrary to reports  
197 from *Mecp2*-null mouse models (Gabel et al., 2015; Sugino et al., 2014).

198 Although long genes do not appear to be upregulated above the level of background noise in  
199 murine *Mecp2* datasets, they have been reported to be preferentially upregulated in human RTT samples  
200 (Gabel et al., 2015) as well, and we wondered if a more robust signal would be observed in post-mortem  
201 human datasets. Three RTT and three normal control samples from the superior frontal gyrus were  
202 obtained from a previous study (Deng et al., 2007). These samples were from three different ages: RTT  
203 samples were obtained from donors aged 8, 6, and <4 years (pooled samples from a 2- and a 4-year old),  
204 with approximately age-matched normal control samples obtained from donors aged 10, 5 and 2 years,  
205 respectively. The long gene trend was observed (Gabel et al., 2015) in a comparison of the three RTT  
206 samples to the three control samples (Figures 2B). Because stages of brain development and disease  
207 progression in RTT patients change markedly from ages 1 to 5 years before stabilizing (Chahrour and  
208 Zoghbi, 2007), we reanalyzed the data by comparing each sample to its age-matched control separately.  
209 Dysregulation of long genes was observed only in the 2- and 4-year old RTT samples (Figure 2B left  
210 panel), but not in either the 5- or 8-year old RTT samples (Figure 2B right panel). Unfortunately, the  
211 statistical significance of this observation cannot be established because of the small sample size ( $n = 1$   
212 each).

213 To determine whether length-dependent misregulation of long genes occurs in other human  
214 datasets, we analyzed samples from another study (Lin et al., 2016) and in-house generated RNA-Seq  
215 RTT datasets. Lin et al. dataset (Lin et al., 2016) consist of postmortem brain samples from the frontal  
216 and temporal cortex of RTT patients with age-matched controls (age = 17-20 years,  $n = 3$  each). Because  
217 the phenotypes are similar for RTT patients in this age range (Chahrour and Zoghbi, 2007), we grouped  
218 these RTT samples together and compared them to the pooled age-matched controls. We computed  
219 running average plots on the normalized dataset (Experimental Procedures, Figure S1) and did not  
220 observe overrepresentation of long genes in these samples (Figure 2C). Similar results were reported by  
221 the original study (Lin et al., 2016). Consistent with our previous results, there was no long gene trend in  
222 the running average plot of the RNA-Seq RTT dataset collected from a postmortem frontal cortex sample  
223 obtained from an 18-year-old RTT female (Figure 2D, left panel) when it was compared to its age-  
224 matched control (age = 18 years,  $n = 1$  each). To further probe whether the long-gene trend might be

225 present in the early stages of the disease, we compared a RTT postmortem male sample from frontal  
226 cortex (age = 1 year, n = 1) to an age-matched control sample (age = 2 days, n = 1) and again could find  
227 no significant upregulation of long genes (Figure 2D, right panel).

228 One possible explanation for the lack of a long gene trend in human RTT samples is  
229 heterogeneity among the various samples (including differences in the genetic background), which  
230 increases the inherent variability in gene expression among biological replicates. Such variability could  
231 obscure the effects of a subtle bias in the sequencing process. Nevertheless, the present findings suggest  
232 that long genes are not preferentially misregulated in human RTT datasets.

233

### 234 **Differential gene expression analysis for Topotecan and Mecp2 datasets**

235 Our previous analyses suggest that the current transcriptome profiling technologies are limited in  
236 their ability to detect subtle differences in gene expression. We hypothesize that long gene effects, if  
237 genuine, should be apparent in both binning analysis and the traditional differential gene expression  
238 analysis. We, therefore, decided to focus our attention on only the differentially expressed genes that were  
239 reported by previous studies (Baker et al., 2013; Ben-Shachar et al., 2009; Chahrour et al., 2008; Chen et  
240 al., 2015; Huang et al., 2011; King et al., 2013; Mabb et al., 2016). We divided the entire list of  
241 differentially expressed genes into four groups based on gene length (> or < 100kb) and fold-change  
242 direction (either up or down). Consistent with our overlap plots, we found long genes to be substantially  
243 overrepresented and downregulated in Topotecan datasets (Figure 3A). This result proves that our  
244 approach does detect long gene trends in gene expression studies. In the MeCP2 datasets, however, we  
245 did not find a preferential upregulation of long genes (Figures 3B-3D) except in the hippocampal dataset  
246 (Figure S5) (Baker et al., 2013). Moreover, in contrast to previous studies, we found that more long genes  
247 were upregulated than downregulated in the cerebellum of *Mecp2* over-expressing mice (Figure 3C, right  
248 panel). Another important difference between the Topotecan and *Mecp2* datasets was that short genes  
249 dominated among all differentially expressed genes in *Mecp2* datasets (Figures 3B-3D; Figures S5). This  
250 further supports the notion that a preference for long gene misregulation is not an inherent feature of gene  
251 expression following the *Mecp2* disruption. This is not to say that MeCP2 does not regulate a subset of  
252 long genes, only that our analysis found no preferential misregulation of long gene trend in MeCP2  
253 mouse models.

254

### 255 **RNA-Seq and microarray benchmark datasets are prone to length-dependent bias**

256 To investigate whether length dependent bias might be a function of amplification-based  
257 platforms, we next performed running average analysis on the samples from the phase-III  
258 Sequencing/Microarray Quality Control (SEQC) project (Consortium, 2014). SEQC was designed to



259 evaluate the performance of various sequencing platforms, sources of bias in gene expression samples,  
260 and various methods for downstream analysis. The consortium generated benchmark datasets using four  
261 different types of RNA samples: A (Universal Human Reference RNA), B (Human Brain Reference  
262 RNA), C (a mixture of A and B at a ratio of 3:1), and D (a mixture of A and B at a defined ratio of 1:3).  
263 The RNA-Seq datasets generated using the Illumina HiSeq 2000 platform across six different sites were  
264 used for quality control analyses (Experimental Procedures), and the raw read counts were normalized  
265 using the DESeq2 method (Love et al., 2014).

266 To determine whether the dataset showed nominal batch effects or other non-biological  
267 variability, we used multidimensional scaling (MDS) plots to see if the samples clustered according to  
268 RNA sample type. To ascertain whether or not the samples were consistently titrated, we calculated the  $\beta$   
269 ratio of observed gene expression in the samples, which is obtained from the following equation:  $((B-$   
270  $A)/(C-A))$  (Consortium, 2014). The value of the  $\beta$  ratio (Shippy et al., 2006) is 4:1 (or  $\log_2(4) = 2$ ). In  
271 theory, the  $\beta$  ratio should be independent of gene length in the brain and non-brain tissues. After assessing  
272 various SEQC datasets, we found that the Novartis dataset had nominal batch effects and the  $\beta$  ratio was  
273 close to 2. Therefore, this dataset would be ideal, as it would not bias downstream analyses (Figure 4A).

274 We separated Human Brain Reference (sample type B) RNA-Seq samples into two groups of 32  
275 samples each, based on their y-axis coordinates of the MDS plot, and computed a running average plot.  
276 Since these samples were technical replicates of the same reference RNA sample type, we expected the  
277 mean  $\log_2$  fold-change to be a horizontal line along the x-axis with a y-intercept equal to zero (i.e.,  $y=0$  on  
278 an xy plane). Instead, we found that long genes deviated from the expected pattern, with the fold-changes  
279 of long genes being overestimated (Figure S6A, left panel).

280 We then investigated whether the fold-change of long genes is constant for the  $\beta$  ratio samples.  
281 The expected average  $\log_2$  fold-change should be a horizontal line along the x-axis with a y-intercept  
282 equal to two. We found, however, that the expected ratio was not maintained for long genes and was  
283 overestimated (Figure 4B). Moreover, we observed a similar bias in the  $\beta$  ratio with respect to transcript  
284 length, with longer transcripts being overrepresented (Figure S6A, right panel). Overall, the range of  
285 overestimation in the RNA-Seq dataset was between 3% and 40%. Consistent with our findings, another  
286 study (using a different dataset) previously reported that long genes were more likely to be identified as  
287 statistically significant in RNA-Seq datasets (Oshlack and Wakefield, 2009).

288 To determine whether the long gene bias was unique to the RNA-Seq datasets or could be  
289 detected on other platforms, we investigated the MAQC-III microarray Affymetrix dataset generated by  
290 the SEQC consortium (Consortium, 2014). Human Brain Reference samples (B) were separated into two  
291 groups based on y-axis location on the MDS plot (Figure 4C). The running average plots were computed  
292 against their average gene length using the same parameters as described for the RNA-Seq analysis

293 above. As with the RNA-Seq samples, the average fold-change for long genes deviated from the expected  
294 value of zero (Figure S6B, left panel). When the  $\beta$  ratio was plotted against the mean gene length (Figure  
295 4D) or mean transcript length (Figure S6B right panel), we found that long genes were overrepresented.  
296 Further, long gene bias was observed in both RNA-Seq and microarray datasets in a comparison of two  
297 groups of universal human reference (Figure S6A-S6B, middle panel). The overestimation in the  
298 microarray dataset ranged from 1.5% to 23%—lower overall than for the RNA-Seq dataset, but indicating  
299 that microarray datasets are also predisposed to gene and transcript length-dependent bias.

300

### 301 **Long gene bias is independent of normalization methods**

302 To ensure that the long gene bias we observed was not due to our normalization methods, we  
303 compared the mean  $\log_2$  fold-change using three different normalization techniques: Total Count, DESeq  
304 (Anders and Huber, 2010), and edgeR/TMM (Robinson et al., 2010; Robinson and Oshlack, 2010). We  
305 normalized the raw read counts from four different RNA sample types using each of the three  
306 normalization methods and computed running average plots of the  $\beta$  ratios against gene and transcript  
307 length. In all cases, long genes were still overestimated, regardless of the normalization method (Figures  
308 S7A-S7B). This lends support to the notion that the overrepresentation of long genes is independent of the  
309 normalization technique.

310

### 311 **Long gene bias is not observed in NanoString datasets, which are not based on amplification**

312 We hypothesized that PCR amplification, a process shared by both microarray and RNA-Seq  
313 technologies, might introduce the observed bias in long gene expression. We, therefore, performed  
314 NanoString nCounter gene expression quantification, a technique that does not use amplification, with the  
315 SEQC reference RNA samples (A, B, C, and D) ( $n = 6$  each). The MDS plot on normalized data showed  
316 that the samples clustered based on sample type (Figure S8A); the effect of batches was minimal  
317 (Experimental Procedures). The code set consisted of  $\sim 184$  long genes, out of which  $\sim 132$  long genes  
318 were expressed in brain samples (Figure S8B). We again computed the running average plots against their  
319 average gene length, and we did not observe any long gene bias between the brain samples or when  
320 computing the  $\beta$  ratio of the samples (Figures S8C- S8D).

321 We next compared the mean expression levels of all the common genes across the RNA-Seq,  
322 microarray and nCounter datasets. Our analysis shows that fold-changes of long genes are overestimated  
323 in the RNA-Seq ( $P$ -value  $< 2.7 \times 10^{-7}$ ; Figure 4E) and microarray datasets ( $P$ -value  $< 0.021$ ; Figure 4F); in  
324 contrast, the nCounter dataset showed no difference in the average expression of long and short genes ( $P$ -  
325 value = 0.86; Figure 4G). Although it is possible that the smaller number of genes ( $\sim 680$ ) might make it  
326 more difficult to detect a preference, the proportion of long genes in this dataset ( $\sim 180$  out of  $\sim 680$  genes,

327 or 26%) is twice that found in the human transcriptome (~3200 long genes out of ~ 24,000 genes, or  
328 13%). Any preference for long genes should thus be revealed even more strongly in this dataset. These  
329 results lead us to posit that the long gene overestimation we observed in RNA-Seq and microarray  
330 datasets might be caused by a length-dependent bias in PCR amplification.

331

### 332 **PCA plot confirms the reciprocal relationship of *Mecp2* gain- and loss-of-function datasets**

333 One of the most intriguing components of the long gene story in RTT is the presence of a  
334 reciprocal pattern in the *Mecp2*-overexpression model, where a reported preference for downregulation of  
335 long genes complements the upregulation of long genes reported in *Mecp2*-null mice (Gabel et al., 2015).  
336 To understand this reciprocal relationship, we divided Human Brain Reference samples (B) into 3 groups  
337 (n = 16 each) based on different library preparation ID numbers from the Novartis SEQC dataset. The  
338 PCA plot clearly clustered the brain samples based on the library preparation group to which they  
339 belonged (Figure S9A). Comparing the brain samples of library preparation ID 2 (green) to library  
340 preparation ID 1 (red) and ID 3 (blue) separately reversed the running average plot (Figures S9B-S9C).  
341 These results show that a reciprocal relationship can be observed in the gene expression data between any  
342 groups that form three distinct clusters on a PCA plot.

343 We next assessed the influence of the fold-change threshold on differential expression analysis  
344 using brain samples. Although we did not expect to see a trend between replicates, preferential regulation  
345 of long genes was observed (Figure S9D) when the fold-change was small (<10%, or  $\log_2FC \sim 13\%$ ).  
346 The bias was similar to the trend observed in previously published *Mecp2*-null and overexpression (Tg)  
347 models when library preparations ID 2 (red) and ID 1 (green), or library preparations ID 3 (blue) and ID 1  
348 (green), were compared (Gabel et al., 2015; Sugino et al., 2014).

349 In this analysis, all the samples were technical replicates of the same reference RNA and were  
350 expected to have identical gene expression levels, but variation associated with library preparation  
351 resulted in the samples not clustering together and allowed us to observe an inverse trend in long genes  
352 (Figure S9A). Just as biological variation can lead to separation on a PCA plot, so can technical variation,  
353 and both can result in the same apparent long gene bias observed in *Mecp2* datasets. Furthermore, our  
354 analysis suggests that differentially expressed genes can be highly variable with small fold-changes,  
355 which underscores the importance of proper fold-change cut-offs in differential gene expression analysis.

356

### 357 **Differentially expressed genes with small fold-changes identified by RNA-Seq are not reproducible 358 by NanoString in the *Mecp2* dataset**

359 To determine whether a long gene trend is present only in the *Mecp2* RNA-Seq dataset and not in  
360 the NanoString dataset, we generated RNA-Seq (> 90 million paired-end sequencing reads per sample; n

361 = 3 each; Table 3) and NanoString (n = 3 each; Table 4) datasets on cerebellar tissue from wild-type and  
362 *Mecp2*-null mouse models (KO). The PCA plot on normalized datasets (Experimental Procedures)  
363 showed that the samples clustered based on sample type (Figures S10A-S10B, left panel). Transcriptome  
364 analysis was performed using DESeq2 (Love et al., 2014) on both datasets. We first analyzed RNA-Seq  
365 data to estimate the strength of the long gene trend. Although there appeared to be a long gene trend in the  
366 KO/WT comparison, an overlap plot confirmed there was no significant upregulation of long genes  
367 (Figure S10A, middle panel). Consistent with our previous findings, there was no preferential  
368 upregulation of long genes in our differential expression analysis (Figure S10A, right panel; absolute  
369  $\log_2FC > 1.2$  &  $FDR < 0.05$ ).

370 We performed further analysis using a list of 750 (~159 long and ~591 short) genes common to  
371 both RNA-Seq and nCounter NanoString (Experimental Procedures). Comparison of the log fold-changes  
372 using the classic method (i.e.,  $\log_2((\text{mean}(\text{group1}) + 1)/(\text{mean}(\text{group2}) + 1))$ ) and using shrunken log fold-  
373 changes by DESeq2 (i.e., obtaining reliable variance estimates by pooling information across all the  
374 genes) suggested that the latter method yields more highly correlated fold-changes (Figures S10C). This  
375 is consistent with previous findings showing that shrunken log fold-changes are more reproducible (Love  
376 et al., 2014; Robinson et al., 2010). Even with this method, however, we observed high variability among  
377 genes with low fold-changes between the two datasets, regardless of whether they were long or short  
378 (Figures 5A and 5B). Moreover, genes with high fold-changes in expression ( $\sim FC > 20\%$ ) were  
379 consistently called as differentially expressed in both the datasets (Figures 5A and 5B).

380 This analysis suggests that the genes identified as differentially expressed by RNA-Seq at lower  
381 fold changes are not reproducible by NanoString. To determine whether fold-changes are inflated in  
382 RNA-Seq, we compared the absolute difference of  $\log_2$  fold-change between the RNA-Seq and  
383 NanoString datasets. We observed fold-changes of long genes to be overestimated by RNA-Seq  
384 technology (Figure 5C; Chi-Square test;  $p\text{-value} < 7.44e-3$ ), which further supports our hypothesis that  
385 artefactual long gene trends are more likely to appear in amplification-based expression datasets.

386

## 387 **DISCUSSION**

388 Several recent papers have suggested that diseases associated with synaptic dysfunction tend to  
389 preferentially involve misregulation of long genes (>100 Kb) (Gabel et al., 2015; King et al., 2013;  
390 Sugino et al., 2014; Zylka et al., 2015). To establish a statistical baseline for the length-dependent gene  
391 regulation analysis, we took advantage of a large number of SEQC consortium datasets where the relative  
392 gene expression fold-change has been measured using RNA-Seq and microarray. We demonstrated the  
393 power of big data analysis by uncovering major sources of technical variation such as intra-sample  
394 variation and PCR amplification bias that can affect the analysis of long gene expression. By contrast,

395 NanoString nCounter technology, which does not rely on amplification, revealed no long gene bias. Our  
396 results demonstrate that amplification-based transcriptomic technologies can lead to overestimations of  
397 long gene expression changes.

398 This is not to say that there is never a bias toward expression changes in long genes. The  
399 topotecan dataset showed an authentic long gene trend even after accounting for baseline variability. This  
400 sizeable effect on long gene expression is consistent with the biological function of topotecan inhibiting  
401 topoisomerase I; long genes should, in theory, be more dependent on proper unwinding during  
402 transcription elongation (King et al., 2013). By contrast, we found no bias toward long gene  
403 dysregulation in the MeCP2 datasets after baseline correction, even when we focused on only those genes  
404 that are differentially expressed to a statistically significant degree. The sole exception was the one  
405 infantile RTT case, but a single case does not allow us to draw any firm conclusions. Again, this does not  
406 rule out that MeCP2 regulates some long genes; it simply does not support a preferential misregulation of  
407 long genes by mutant MeCP2.

408 Apparent expression changes in long genes are clearly liable to exaggeration by biases in  
409 microarray and RNA-Seq. We recommend eliminating confounds such as batch effects and properly  
410 estimating both inter- and intra-sample variations; the control datasets must be carefully analyzed in order  
411 to reveal the degree of baseline variability, which then can inform further analyses of the size of the signal  
412 required to overcome background noise in sequencing datasets (Figure S1). These findings are applicable  
413 to all research that utilizes current microarray and sequencing technologies. We hope that revealing the  
414 influence of protocols and technologies on RNA sequencing data will lead to improved technologies and  
415 more reliable analyses for amplification-based sequencing data.

416

#### 417 **AUTHOR CONTRIBUTIONS**

418 Conceptualization: ZL, HYZ, ATR, AEP; Methodology and Investigation: ATR, ZL; Software,  
419 Validation and Analysis: ATR, YWW, AEP; Data Curation: ATR, BL, AEP, YWW, HKY; Writing –  
420 Original Draft: ATR, ZL, AEP; Writing – Review & Editing: ATR, ZL, AEP, YWW; Visualization:  
421 ATR, YWW; Supervision: ZL, HYZ; Funding Acquisition: ZL, HYZ.

422

#### 423 **ACKNOWLEDGMENTS**

424 We thank Laura Lavery, Rami Al-Ouran, Laura Lombardi, Ezequiel Sztainberg, Aya Ishida, and Vicky  
425 Brandt for helpful discussions and suggestions. This project was supported by the Genomic and RNA  
426 Profiling Core at Baylor College of Medicine and the expert assistance of the Core Director, Lisa D.  
427 White, Ph.D.

428

429 **ACCESSION NUMBERS**

430 The GEO accession numbers for NanoString and RNA-seq datasets reported in this paper are as  
431 follows: GSE94073, GSE105047 (includes GSE105045 and GSE105046) and GSE107399.

432

433 **REFERENCES**

434 Anders, S., and Huber, W. (2010). Differential expression analysis for sequence count data. *Genome*  
435 *biology* 11, 1.

436 Baker, S.A., Chen, L., Wilkins, A.D., Yu, P., Lichtarge, O., and Zoghbi, H.Y. (2013). An AT-hook domain  
437 in MeCP2 determines the clinical course of Rett syndrome and related disorders. *Cell* 152, 984-996.

438 Barrett, T., Wilhite, S.E., Ledoux, P., Evangelista, C., Kim, I.F., Tomashevsky, M., Marshall, K.A.,  
439 Phillippy, K.H., Sherman, P.M., and Holko, M. (2013). NCBI GEO: archive for functional genomics data  
440 sets—update. *Nucleic acids research* 41, D991-D995.

441 Ben-Shachar, S., Chahrour, M., Thaller, C., Shaw, C.A., and Zoghbi, H.Y. (2009). Mouse models of  
442 MeCP2 disorders share gene expression changes in the cerebellum and hypothalamus. *Human molecular*  
443 *genetics* 18, 2431-2442.

444 Chahrour, M., Jung, S.Y., Shaw, C., Zhou, X., Wong, S.T., Qin, J., and Zoghbi, H.Y. (2008). MeCP2, a  
445 key contributor to neurological disease, activates and represses transcription. *Science* 320, 1224-1229.

446 Chahrour, M., and Zoghbi, H.Y. (2007). The story of Rett syndrome: from clinic to neurobiology. *Neuron*  
447 56, 422-437.

448 Chen, L., Chen, K., Lavery, L.A., Baker, S.A., Shaw, C.A., Li, W., and Zoghbi, H.Y. (2015). MeCP2  
449 binds to non-CG methylated DNA as neurons mature, influencing transcription and the timing of onset for  
450 Rett syndrome. *Proceedings of the National Academy of Sciences* 112, 5509-5514.

451 Consortium, S.M.-I. (2014). A comprehensive assessment of RNA-seq accuracy, reproducibility and  
452 information content by the Sequencing Quality Control Consortium. *32*, 903-914.

453 Cuddapah, V.A., Pillai, R.B., Shekar, K.V., Lane, J.B., Motil, K.J., Skinner, S.A., Tarquinio, D.C., Glaze,  
454 D.G., McGwin, G., Kaufmann, W.E., *et al.* (2014). Methyl-CpG-binding protein 2 (MECP2) mutation  
455 type is associated with disease severity in Rett syndrome. *J Med Genet* 51, 152-158.

456 Deng, V., Matagne, V., Banine, F., Frerking, M., Ohliger, P., Budden, S., Pevsner, J., Dissen, G.A.,  
457 Sherman, L.S., and Ojeda, S.R. (2007). FXYD1 is an MeCP2 target gene overexpressed in the brains of  
458 Rett syndrome patients and *Mecp2*-null mice. *Human molecular genetics* 16, 640-650.

459 Dillies, M.-A., Rau, A., Aubert, J., Hennequet-Antier, C., Jeanmougin, M., Servant, N., Keime, C., Marot,  
460 G., Castel, D., and Estelle, J. (2013). A comprehensive evaluation of normalization methods for Illumina  
461 high-throughput RNA sequencing data analysis. *Briefings in bioinformatics* 14, 671-683.

462 Dobin, A., Davis, C.A., Schlesinger, F., Drenkow, J., Zaleski, C., Jha, S., Batut, P., Chaisson, M., and  
463 Gingeras, T.R. (2013). STAR: ultrafast universal RNA-seq aligner. *Bioinformatics* 29, 15-21.

464 Eppig, J.T., Blake, J.A., Bult, C.J., Kadin, J.A., Richardson, J.E., and Group, M.G.D. (2015). The Mouse  
465 Genome Database (MGD): facilitating mouse as a model for human biology and disease. *Nucleic acids*  
466 *research* 43, D726-D736.

467 Gabel, H.W., Kinde, B., Stroud, H., Gilbert, C.S., Harmin, D.A., Kastan, N.R., Hemberg, M., Ebert, D.H.,  
468 and Greenberg, M.E. (2015). Disruption of DNA-methylation-dependent long gene repression in Rett  
469 syndrome. *Nature* 522, 89-93.

- 470 Gautier, L., Cope, L., Bolstad, B.M., and Irizarry, R.A. (2004). *affy*—analysis of Affymetrix GeneChip  
471 data at the probe level. *Bioinformatics* 20, 307-315.
- 472 Hansen, K.D., Brenner, S.E., and Dudoit, S. (2010). Biases in Illumina transcriptome sequencing caused  
473 by random hexamer priming. *Nucleic acids research* 38, e131-e131.
- 474 Huang, H.-S., Allen, J.A., Mabb, A.M., King, I.F., Miriyala, J., Taylor-Blake, B., Sciaky, N., Dutton, J.W.,  
475 Lee, H.-M., Chen, X., *et al.* (2011). Topoisomerase inhibitors unsilence the dormant allele of *Ube3a* in  
476 neurons. 481, 185-189.
- 477 Irizarry, R.A., Hobbs, B., Collin, F., Beazer-Barclay, Y.D., Antonellis, K.J., Scherf, U., and Speed, T.P.  
478 (2003). Exploration, normalization, and summaries of high density oligonucleotide array probe level data.  
479 *Biostatistics* 4, 249-264.
- 480 Johnson, B.S., Zhao, Y.T., Fasolino, M., Lamonica, J.M., Kim, Y.J., Georgakilas, G., Wood, K.H., Bu, D.,  
481 Cui, Y., Goffin, D., *et al.* (2017). Biotin tagging of MeCP2 in mice reveals contextual insights into the  
482 Rett syndrome transcriptome. *Nat Med*.
- 483 Katz, D.M., Bird, A., Coenraads, M., Gray, S.J., Menon, D.U., Philpot, B.D., and Tarquinio, D.C. (2016).  
484 Rett Syndrome: Crossing the Threshold to Clinical Translation. 39, 100-113.
- 485 Kinde, B., Wu, D.Y., Greenberg, M.E., and Gabel, H.W. (2016). DNA methylation in the gene body  
486 influences MeCP2-mediated gene repression. *Proceedings of the National Academy of Sciences of the*  
487 *United States of America*.
- 488 King, I.F., Yandava, C.N., Mabb, A.M., Hsiao, J.S., Huang, H.-S., Pearson, B.L., Calabrese, J.M.,  
489 Starmer, J., Parker, J.S., and Magnuson, T. (2013). Topoisomerases facilitate transcription of long genes  
490 linked to autism. *Nature* 501, 58-62.
- 491 Kishi, N., MacDonald, J.L., Ye, J., Molyneaux, B.J., Azim, E., and Macklis, J.D. (2016). Reduction of  
492 aberrant NF- $\kappa$ B signalling ameliorates Rett syndrome phenotypes in *Mecp2*-null mice. *Nat Commun* 7,  
493 10520.
- 494 Lahens, N.F., Kavakli, I.H., Zhang, R., Hayer, K., Black, M.B., Dueck, H., Pizarro, A., Kim, J., Irizarry,  
495 R., and Thomas, R.S. (2014). IVT-seq reveals extreme bias in RNA sequencing. *Genome Biol* 15, 1.
- 496 Lawrence, M., Huber, W., Pages, H., Aboyoun, P., Carlson, M., Gentleman, R., Morgan, M.T., and Carey,  
497 V.J. (2013). Software for computing and annotating genomic ranges. *PLoS computational biology* 9,  
498 e1003118.
- 499 Li, J., Jiang, H., and Wong, W.H. (2010). Modeling non-uniformity in short-read rates in RNA-Seq data.  
500 *Genome Biol* 11, 1.
- 501 Lin, P., Nicholls, L., Assareh, H., Fang, Z., Amos, T.G., Edwards, R.J., Assareh, A.A., and Voineagu, I.  
502 (2016). Transcriptome analysis of human brain tissue identifies reduced expression of complement  
503 complex C1Q Genes in Rett syndrome. *BMC Genomics* 17, 427.
- 504 Love, M.I., Huber, W., and Anders, S. (2014). Moderated estimation of fold change and dispersion for  
505 RNA-seq data with DESeq2. *Genome biology* 15, 1.
- 506 Mabb, A.M., Simon, J.M., King, I.F., Lee, H.M., An, L.K., Philpot, B.D., and Zylka, M.J. (2016).  
507 Topoisomerase 1 Regulates Gene Expression in Neurons through Cleavage Complex-Dependent and -  
508 Independent Mechanisms. *PLoS One* 11, e0156439.
- 509 Oshlack, A., and Wakefield, M.J. (2009). Transcript length bias in RNA-seq data confounds systems  
510 biology. 4, 14.
- 511 Ouwenga, R.L., and Dougherty, J. (2015). *Fmrp* targets or not: long, highly brain-expressed genes tend to  
512 be implicated in autism and brain disorders. 6, 16.

- 513 Risso, D., Schwartz, K., Sherlock, G., and Dudoit, S. (2011). GC-Content Normalization for RNA-Seq  
514 Data. 12, 480.
- 515 Robert, C., and Watson, M. (2015). Errors in RNA-Seq quantification affect genes of relevance to human  
516 disease. 16.
- 517 Robinson, M.D., McCarthy, D.J., and Smyth, G.K. (2010). edgeR: a Bioconductor package for  
518 differential expression analysis of digital gene expression data. *Bioinformatics* 26, 139-140.
- 519 Robinson, M.D., and Oshlack, A. (2010). A scaling normalization method for differential expression  
520 analysis of RNA-seq data. *Genome Biol* 11, 1.
- 521 Samaco, R.C., Mandel-Brehm, C., McGraw, C.M., Shaw, C.A., McGill, B.E., and Zoghbi, H.Y. (2012).  
522 Crh and Oprm1 mediate anxiety-related behavior and social approach in a mouse model of MECP2  
523 duplication syndrome. 44, 206-211.
- 524 Shippy, R., Fulmer-Smentek, S., Jensen, R.V., Jones, W.D., Wolber, P.K., Johnson, C.D., Pine, P.S.,  
525 Boysen, C., Guo, X., Chudin, E., *et al.* (2006). Using RNA sample titrations to assess microarray platform  
526 performance and normalization techniques. *Nature biotechnology* 24, 1123-1131.
- 527 Sugino, K., Hempel, C.M., Okaty, B.W., Arnson, H.A., Kato, S., Dani, V.S., and Nelson, S.B. (2014).  
528 Cell-Type-Specific Repression by Methyl-CpG-Binding Protein 2 Is Biased toward Long Genes. 34,  
529 12877-12883.
- 530 Sullivan, J.M., Badimon, A., Schaefer, U., Ayata, P., Gray, J., Chung, C.-w., von Schimmelmann, M.,  
531 Zhang, F., Garton, N., Smithers, N., *et al.* (2015). Autism-like syndrome is induced by pharmacological  
532 suppression of BET proteins in young mice. 212, 1771-1781.
- 533 Waggott, D., Chu, K., Yin, S., Wouters, B.G., Liu, F.-F., and Boutros, P.C. (2012). NanoStringNorm: an  
534 extensible R package for the pre-processing of NanoString mRNA and miRNA data. *Bioinformatics* 28,  
535 1546-1548.
- 536 Wan, Y.-W., Mach, C.M., Allen, G.I., Anderson, M.L., and Liu, Z. (2014). On the reproducibility of  
537 TCGA ovarian cancer microRNA profiles. *PloS one* 9, e87782.
- 538 Zhao, Y.-T., Goffin, D., Johnson, B.S., and Zhou, Z. (2013). Loss of MeCP2 function is associated with  
539 distinct gene expression changes in the striatum. 59, 257-266.
- 540 Zoghbi, H.Y., and Bear, M.F. (2012). Synaptic dysfunction in neurodevelopmental disorders associated  
541 with autism and intellectual disabilities. *Cold Spring Harbor perspectives in biology* 4, a009886.
- 542 Zylka, M.J., Simon, J.M., and Philpot, B.D. (2015). Gene Length Matters in Neurons. 86, 353-355.

543  
544 **FIGURES and TABLES**

545  
546 **Figure 1. Establishment of baselines and comparison of Mecp2 microarray and RNA-Seq datasets.**

547 **A) Topotecan datasets:** The top half of each subgraph shows the comparison of cultured cortical neurons  
548 treated with vehicle (V) from C57BL/6J (B6) × CASTeI/J (CAST) F1 hybrid mice with other vehicle-  
549 treated samples (V/V, blue line) and comparison of topotecan-treated cortical neurons (D) with vehicle-  
550 treated samples (D/V, red line). The red and blue lines diverge only for genes over 100kb in size. **(B-D)**  
551 **Mecp2 datasets:** Note the change in the scale of y-axis; these changes are much smaller than in the  
552 topotecan studies. Unlike the topotecan results in row A, gene bins with statistical significance are



553 sporadic for both long and short genes in row B. The top half of each subgraph in row **B**) shows the  
554 comparison of WT male C57BL samples with other WT male C57BL samples (blue line) and *Mecp2*  
555 male KO samples compared with WT male littermates (red line) in the amygdala (Samaco et al., 2012),  
556 cerebellum (Ben-Shachar et al., 2009) and hypothalamus (Chahrour et al., 2008). **C**) Comparison of three  
557 different *Mecp2* Tg/WT male mouse models. The top half of each subgraph shows the comparison  
558 between WT FVB samples and other WT FVB samples (blue line) within the same genotype and Tg  
559 samples with their WT littermates (red line) in amygdala (Samaco et al., 2012), cerebellum (Ben-Shachar  
560 et al., 2009) and hypothalamus (Chahrour et al., 2008). Note that we observe few long gene bins as well  
561 as short gene bins with significant preferential upregulation in *Mecp2*-null and *Mecp2*-overexpression  
562 (Tg) mice datasets. **D**) Cortical excitatory neurons from three different *Mecp2* KO/WT female mouse  
563 models. The top half of each subgraph shows the comparison between two sets of WT C57BL samples  
564 (blue line), and between WT littermates and mutant mice bearing either the R106W or T158M mutations  
565 (Johnson et al., 2017). Note that the magnitude of length dependent gene misregulation was more  
566 substantial in control samples rather than *Mecp2*-mutant samples (blue curve). The blue or red line  
567 represents fold-change in expression for genes binned according to gene length (bin size of 200 genes  
568 with shift size of 40 genes) as described in (Gabel et al., 2015). The blue and red shaded areas correspond  
569 to one-half of one standard deviation of each bin for the comparison of WT/WT and KO/WT (or  
570 MUT/WT) or Tg/WT, respectively. The bottom half of each subgraph is the p-value from the two-sample  
571 t-test between KO/WT (or MUT/WT) or Tg/WT and WT/WT. Bins with  $FDR < 0.05$  are shown as a red  
572 dot. The red dashed line at the bottom of the subgraphs indicates the minimum  $-\text{Log}_{10}(\text{p-value})$  that  
573 corresponds to a  $FDR < 0.05$ . Please refer to Table 1 for the total number of samples used for the  
574 comparison between two random sets of WT (or vehicle-treated) samples and between WT littermates  
575 and KO/Tg/mutant mice.

576  
577 **Figure 2. No bias toward long genes in MECP2 human datasets.** **(A)** RNA-Seq analysis of isogenic  
578 human Rett *in vitro* models. Overlap plots were used to compare WT and KO samples, where the top half  
579 of each subgraph shows the comparison of WT samples with other WT samples (blue line), and RTT  
580 samples compared with WT samples (red line) in iPSC (left panel), Neural progenitor cells or NPC  
581 (middle panel), and neurons (right panel). **(B)** Microarray analysis of human RTT brain samples  
582 compared to age-matched control for Frontal Cortex (Deng et al., 2007). Comparison of gene trends in the  
583 pooled sample from 2- and 4-year old patients (left panel) and whole dataset (left panel). Observed long  
584 gene trend in the sample from 5-year old (right panel) and 8-year old patients (right panel). **(C)**  
585 Microarray analysis of RTT human frontal cortex samples (Lin et al., 2016) compared to controls (left  
586 panel) and RTT human temporal cortex samples (Lin et al., 2016) compared to controls (right panel). **(D)**

587 RNA-Seq analysis of RTT human (female) frontal cortex samples compared to controls (left panel) and  
588 RTT human (male) frontal lobe samples compared to controls (right panel). The lines in A-D represent  
589 fold-change in expression for genes binned according to gene length (bin size of 200 genes with shift size  
590 of 40 genes) as described in Gabel, Kinde et al. *Nature* 2015. The blue and red ribbons in (A) correspond  
591 to one-half of one standard deviation of each bin for the comparison of WT/WT and MUT/WT  
592 respectively. The bottom half of each subgraph is the p-value from the two-sample t-test between  
593 MUT/WT and WT/WT. Bins with FDR < 0.05 are shown as a red dot. The red dotted line in the bottom  
594 of the subgraphs indicates the minimum  $-\text{Log}_{10}(\text{p-value})$  that corresponds to a FDR < 0.05. Please refer to  
595 Table 1 for the total number of samples used for the comparison between two random sets of WT samples  
596 and between WT and RTT samples.

597

598 **Figure 3. Differentially expressed genes show length-dependent misregulation in Topotecan**  
599 **datasets but not in Meep2 studies.** (A) Scatter plot of log fold-change in expression between topotecan  
600 and vehicle-treated cultured cortical neurons (y-axis) against its gene length (x-axis) in RNA-Seq dataset  
601 from (King et al., 2013) (left panel; n = 5 each; FDR < 0.05) and (Mabb et al., 2016) RNA-Seq dataset  
602 (right panel; n = 3 each; FDR < 0.01). (B) Scatter plot of log fold-change in expression (microarray)  
603 between C57BL KO and its C57BL WT littermates (y-axis) against its gene length (x-axis) in  
604 hypothalamus (left panel; n = 4 each; FDR < 0.05 and  $\log_2\text{FC} > 0.2$ ; (Chahrour et al., 2008)) and  
605 cerebellum (right panel; n = 4 each; FDR < 0.05 and  $\log_2\text{FC} > 0.2$ ; (Ben-Shachar et al., 2009)). (C)  
606 Scatter plot of log fold-change in expression (microarray) between FVB Tg to its FVB WT littermates (y-  
607 axis) against its gene length (x-axis) in hypothalamus (n = 4 each; FDR < 0.05 and  $\log_2\text{FC} > 0.2$ ;  
608 (Chahrour et al., 2008)) and cerebellum (n = 4 each; FDR < 0.05 and  $\log_2\text{FC} > 0.2$ ; (Ben-Shachar et al.,  
609 2009)). (D) Scatter-plot of log fold-change in expression between KO/Tg and WT littermates (y-axis)  
610 against gene length (x-axis) in RNA-Seq datasets: Hypothalamus KO/WT comparison (left panel; n = 3  
611 each; FDR <  $1e-5$ ; (Chen et al., 2015)) and Hypothalamus Tg/WT comparison (right panel; n = 3 each;  
612 FDR <  $1e-5$ ; (Chen et al., 2015)). Red dot represents long genes and blue dot represents short genes.  
613 Differentially expressed genes were obtained from the published gene lists.

614

615 **Figure 4. Long gene bias in SEQC RNA-Seq and microarray, but not NanoString, datasets.** (A)  
616 MDS plot using Euclidean distance on the SEQC (Consortium, 2014) NVS count dataset. (B) Mean Log2  
617 Fold Change plot against gene length using  $\beta$  ratio samples ((B-A/C-A); n = 64 each) in RNA-Seq dataset.  
618 (C) MDS plot using Euclidean distance on the SEQC microarray dataset. (D) Mean Log2 Fold-Change  
619 plot against gene length using  $\beta$  ratio samples in microarray dataset (n = 4 each). Each blue dot is a bin of  
620 200 genes with shift size of 40 genes (Gabel et al., 2015). Box plot of the genes across three different

621 platforms that are present in NanoString codeset. The distributions of the mean fold-changes for  $\beta$  ratio  
622 samples for long and short genes are compared across three different platforms: **E)** RNA-Seq, **F)**  
623 Microarray, and **G)** NanoString. P-values were computed using the Wilcoxon Mann Whitney test.

624

625 **Figure 5. Expression changes are overestimated in RNA-Seq datasets.** Comparison of log fold-change  
626 in expression between RNA-Seq and Nanostring for Short Genes (**A**) and Long Genes (**B**). Here, we used  
627  $FDR < 0.05$  for a gene to be considered differentially expressed. A Red dot represents genes that are  
628 called as differentially expressed by both platforms. The Green and Blue dot represents genes that are  
629 called differentially expressed by Nanostring and RNA-Seq respectively. **C)** Absolute log fold-change  
630 difference between RNA-Seq and Nanostring (y-axis) against gene length (x-axis). A Red dot represents  
631 long gene and blue dot represents short genes. P-values were computed using chi-square test.

632

633 Table 1: List of Comparisons used in overlap or average plots

634

| Brain region                                                                | Mouse strain/Human samples compared                                                                                                                                                    | Reference                                         |
|-----------------------------------------------------------------------------|----------------------------------------------------------------------------------------------------------------------------------------------------------------------------------------|---------------------------------------------------|
| <b>Fig 1A.</b> Cultured Cortical Neurons (left panel)                       | BL: Hybrid Vehicle vs Hybrid Vehicle (n = 2 each)<br>RL: Hybrid Topotecan vs Hybrid Vehicle (n = 5 each)                                                                               | King et al. <i>Nature</i> 2013                    |
| Cultured Cortical Neurons (middle panel)                                    | BL: Hybrid Vehicle vs Hybrid Vehicle (n = 1 each)<br>RL: Hybrid Topotecan vs Hybrid Vehicle (n = 3 each)                                                                               | King et al. <i>Nature</i> 2013                    |
| Cultured Cortical Neurons (right panel)                                     | BL: Hybrid Vehicle vs Hybrid Vehicle (n = 1 each)<br>RL: Hybrid Topotecan vs Hybrid Vehicle (n = 3 each)                                                                               | Mabb et al. <i>PLoS One</i> 2016                  |
| <b>Fig 1B.</b> Amygdala (left panel)                                        | BL: C57BL WT vs C57BL WT (n = 2 each)<br>RL: C57BL KO vs C57BL WT (n = 5 each)                                                                                                         | Samaco et al. <i>Nature Genetics</i> 2012         |
| Cerebellum (middle panel)                                                   | BL: C57BL WT vs C57BL/6J WT (n = 2 each)<br>RL: C57BL KO vs C57BL/6J WT (n = 5 each)                                                                                                   | Ben-Shachar et al., <i>Human Mol. Genet.</i> 2009 |
| Hypothalamus (right panel)                                                  | BL: C57BL WT vs C57BL/6J WT (n = 2 each)<br>RL: C57BL KO vs C57BL/6J WT (n = 4 each)                                                                                                   | Chahrour et al., <i>Science</i> 2008              |
| <b>Fig 1C.</b> Amygdala (left panel)                                        | BL: FVB WT vs FVB WT (n = 2 each)<br>RL: FVB KO vs FVB WT (n = 5 each)                                                                                                                 | Samaco et al. <i>Nature Genetics</i> 2012         |
| Cerebellum (middle panel)                                                   | BL: FVB WT vs FVB WT (n = 2 each)<br>RL: FVB KO vs FVB WT (n = 5 each)                                                                                                                 | Ben-Shachar et al. <i>Human Mol. Genet.</i> 2009  |
| Hypothalamus (right panel)                                                  | BL: FVB WT vs FVB WT (n = 2 each)<br>RL: FVB KO vs FVB WT (n = 4 each)                                                                                                                 | Chahrour et al., <i>Science</i> 2008              |
| <b>Fig 1D.</b> Cortical Excitatory Neurons R106W <sub>WT</sub> (left panel) | BL: C57BL WT vs C57BL WT (n = 1 each)<br>RL: C57BL R106W <sub>WT</sub> vs C57BL WT (n = 2 each)                                                                                        | Johnson et al., <i>Nature Medicine</i> 2017       |
| Cortical Excitatory Neurons R106W <sub>MUT</sub> (middle panel)             | BL: C57BL WT vs C57BL WT (n = 1 each)<br>RL: C57BL R106W <sub>MUT</sub> vs C57BL WT (n = 2 each)                                                                                       | Johnson et al., <i>Nature Medicine</i> 2017       |
| Cortical Excitatory Neurons T158M <sub>MUT</sub> (right panel)              | BL: C57BL WT vs C57BL WT (n = 1 each)<br>RL: C57BL T158M <sub>MUT</sub> vs C57BL WT (n = 2 each)                                                                                       | Johnson et al., <i>Nature Medicine</i> 2017       |
| <b>Fig 2A.</b> iPSC (left panel)                                            | BL: iPSC WT vs iPSC WT (n = 2 each)<br>RL: iPSC RTT (n = 4) vs iPSC WT (n = 5 each)                                                                                                    | GSE#                                              |
| NPC (middle panel)                                                          | BL: NPC WT vs NPC WT (n = 2 each)<br>RL: NPC RTT (n = 4) vs NPC WT (n = 5 each)                                                                                                        | GSE#                                              |
| Neuron (right panel)                                                        | BL: Neuron WT vs Neuron WT (n = 2 each)<br>RL: Neuron RTT vs Neuron WT (n = 4 each)                                                                                                    | GSE#                                              |
| <b>Fig 2B.</b> Frontal Cortex (left panel)                                  | RL: Post mortem RTT vs Controls (n = 3 each)<br>BL: Post mortem pooled sample from 2- and 4-year old patient vs Control (n = 1 each)                                                   | Deng et al. <i>Human Mol. Genet.</i> 2007         |
| Frontal Cortex (right panel)                                                | GL: Post mortem pooled sample from 5-year old patient vs age matched control (n = 1 each)<br>PL: Post mortem pooled sample from 8-year old patient vs age matched control (n = 1 each) | Deng et al. <i>Human Mol. Genet.</i> 2007         |
| <b>Fig 2C.</b> Frontal Cortex (left panel)                                  | RTT female samples compared to age matched controls (ages 17-20 years; n = 3)                                                                                                          | Lin et al. <i>BMC Genomics</i> 2016               |
| Temporal Cortex (right panel)                                               | RTT female samples compared to age matched controls (ages 17-20 years; n = 3)                                                                                                          | Lin et al. <i>BMC Genomics</i> 2016               |
| <b>Fig 2D.</b> Frontal Cortex (left panel)                                  | RTT female samples compared to age matched controls (ages 18 years; n = 1 each)                                                                                                        | GSE#                                              |
| Frontal Cortex (right panel)                                                | RTT male samples (age 1 year) to compared to age matched (age 2 day) controls (n = 1 each)                                                                                             | GSE#                                              |

635 *Note:* Hybrid mouse line is C57BL/6J (B6) × CASTEi/J (CAST) F1 hybrid mice. BL, RL, GL and PL stands for  
636 Blue line, Red line, Green line and Purple line respectively.

637

### 638 **Supplementary Figure Legends**

#### 639 **Figure S1 Schematic diagram of rigorous assessment of long gene trends**

640 **(Related to Figure 1).**

641

#### 642 **Figure S2 Long gene trend is not present in *Mecp2* datasets (Related to Figure 1).** (A-L) Analysis of

643 Intra-sample variation in WT *Mecp2* dataset shows a bias toward long genes across different brain  
644 regions. The Blue line (BL) represents the comparison of permuted WT/WT samples from a respective  
645 dataset (as mentioned in the comparison table). The Red line (RL) represents the comparison of  
646 KO/MUT/Tg samples to its WT littermates from a respective dataset (as mentioned in the comparison  
647 table). The top half of each subgraph shows the lines that represent fold-change in expression for genes  
648 binned according to gene length (bin size of 200 genes with shift size of 40 genes) as described (Gabel et  
649 al., 2015; Zhao et al., 2013). Note that we observe few long gene bins as well as short gene bins with  
650 significant preferential upregulation in *Mecp2*-null mice datasets. The blue and red ribbon correspond to  
651 one-half of one standard deviation of each bin for the comparison of WT/WT and KO/WT or Tg/WT,  
652 respectively. The bottom half of each subgraph is the p-value from the two-sample t-test between KO/WT  
653 or Tg/WT and WT/WT. Bins with FDR < 0.05 are showed in red. The red dotted line indicates the  
654 minimum  $-\text{Log}_{10}(\text{p-value})$  that corresponds to a FDR < 0.05.

655

656 Here is the list of comparisons for Figure S2:

657

658

| Brain region                                     | Mouse lines compared                                                                                             | Reference                                |
|--------------------------------------------------|------------------------------------------------------------------------------------------------------------------|------------------------------------------|
| A. Striatum                                      | BL: C57BL WT vs C57BL WT (n = 2 each)<br>RL: C57BL KO vs C57BL WT (n = 5 each)                                   | Zhao et al. <i>Neuro of Disease</i> 2013 |
| B. Hippocampus (4 weeks)                         | BL: FVBx129 WT vs FVBx129 WT (n = 2 each)<br>RL: FVBx129 KO vs FVBx129 WT (n = 4 each)                           | Baker et al. <i>Cell</i> 2013            |
| C. Hippocampus (9 weeks)                         | BL: FVBx129 WT vs FVBx129 WT (n = 2 each)<br>RL: FVBx129 KO vs FVBx129 WT (n = 4 each)                           | Baker et al. <i>Cell</i> 2013            |
| D. Visual Cortex                                 | BL: WT vs WT (n = 1 each)<br>RL: KO (Mecp2tm1.1Bird) vs WT (n = 3 each)                                          | Gabel, Kinde et al. <i>Nature</i> 2015   |
| E. Locus Coeruleus Neurons (TH Young/~P22)       | BL: C57BL/6J WT vs C57BL/6J WT (n = 1 each)<br>RL: C57BL/6J KO vs C57BL/6J WT (n = 3 each)                       | Sugino et al. <i>J Neurosci.</i> 2014    |
| F. Locus Coeruleus Neurons (TH)                  | BL: C57BL/6J WT vs C57BL/6J WT (n = 1 each)<br>RL: C57BL/6J KO vs C57BL/6J WT (n = 3 each)                       | Sugino et al. <i>J Neurosci.</i> 2014    |
| G. Fast Spiking interneurons, Motor Cortex (G42) | BL: C57BL/6J WT vs C57BL/6J WT (n = 2 each)<br>RL: C57BL/6J KO vs C57BL/6J WT (n = 4 each)                       | Sugino et al. <i>J Neurosci.</i> 2014    |
| H. Purkinje Cells, Cerebellum (G42)              | BL: C57BL/6J WT vs C57BL/6J WT (n = 1 each)<br>RL: C57BL/6J KO vs C57BL/6J WT (n = 3 each)                       | Sugino et al. <i>J Neurosci.</i> 2014    |
| I. Pyramidal Neurons, Motor Cortex (YPFH)        | BL: C57BL/6J WT vs C57BL/6J WT (n = 1 each)<br>RL: C57BL/6J KO vs C57BL/6J WT (n = 3 each)                       | Sugino et al. <i>J Neurosci.</i> 2014    |
| J. Callosal Projection Neurons                   | BL: C57BL/6J WT vs C57BL/6J WT (n = 1 each)<br>RL: C57BL/6J KO vs C57BL/6J WT (n = 3 each)                       | Kishi et al. <i>Nature Comm.</i> 2016    |
| K. Hypothalamus (KO – RNA-Seq)                   | BL: FVBx129SvEvTac WT vs FVBx129SvEvTac WT (n=1 each)<br>RL: FVBx129SvEvTac KO vs FVBx129SvEvTac WT (n = 3 each) | Chen et al. <i>PNAS</i> 2015             |
| L. Hypothalamus (Tg – RNA-Seq)                   | BL: FVBx129SvEvTac WT vs FVBx129SvEvTac WT (n=1 each)<br>RL: FVBx129SvEvTac Tg vs FVBx129SvEvTac WT (n = 3 each) | Chen et al. <i>PNAS</i> 2015             |

659

660 **Figure S3 Intra-sample variation bias in WT *Mecp2* datasets is independent of the RNA isolation**  
661 **method (Related to Figure 1):** Blue line (BL) represents the comparison of permuted WT/WT samples  
662 from a respective dataset (as mentioned in the comparison table). The Red line (RL) represents the  
663 comparison of MUT samples to its WT littermates from a respective dataset (as mentioned in the  
664 comparison table). The top half of each subgraph shows the lines that represent fold-change in expression  
665 for genes binned according to gene length (bin size of 200 genes with shift size of 40 genes) as described  
666 (Gabel et al., 2015). The blue and red ribbon correspond to one-half of one standard deviation of each bin  
667 for the comparison of WT/WT and MUT/WT respectively. The bottom half of each subgraph is the p-  
668 value from the two-sample t-test between MUT/WT and WT/WT. Bins with FDR < 0.05 are shown in  
669 red. The red dotted line indicates the minimum -Log<sub>10</sub>(p-value) that corresponds to a FDR < 0.05.

670

| Brain region                | Mouse lines compared                                                                          | Reference                                 |
|-----------------------------|-----------------------------------------------------------------------------------------------|-------------------------------------------|
| A. Male Cortex (GRO-Seq)    | BL: C57BL/6J WT vs C57BL/6J WT (n = 1 each)<br>RL: C57BL/6J R106W vs C57BL/6J WT (n = 2 each) | Johnson et al.<br><i>Nature Med.</i> 2017 |
| B. Male Cortex (Whole Cell) | BL: C57BL/6J WT vs C57BL/6J WT (n = 1 each)<br>RL: C57BL/6J R106W vs C57BL/6J WT (n = 2 each) | Johnson et al.<br><i>Nature Med.</i> 2017 |

671  
672 **Figures S4 Intra sample variation bias in WT *Mecp2* datasets is independent of the sex of mouse of**  
673 **the mouse model (Related to Figure 1):** Blue line (BL) represents the comparison of permuted WT/WT  
674 samples from a respective dataset (as mentioned in the comparison table). The Red line (RL) represents  
675 the comparison of MUT samples to its WT littermates from a respective dataset (as mentioned in the  
676 comparison table). The top half of each subgraph shows the lines that represent fold-change in expression  
677 for genes binned according to gene length (bin size of 200 genes with shift size of 40 genes) as described  
678 (Gabel et al., 2015). The blue and red ribbon correspond to one-half of one standard deviation of each bin  
679 for the comparison of WT/WT and MUT/WT respectively. The bottom half of each subgraph is the p-  
680 value from the two-sample t-test between MUT/WT and WT/WT. Bins with FDR < 0.05 are shown in  
681 red. The red dotted line indicates the minimum  $-\text{Log}_{10}(\text{p-value})$  that corresponds to a FDR < 0.05.  
682

| Brain region                                                | Mouse lines compared                                                                        | Reference                                 |
|-------------------------------------------------------------|---------------------------------------------------------------------------------------------|-------------------------------------------|
| M. Cortical Excitatory Neurons (R106W, <b>Male</b> )        | BL: C57BL/6J WT vs C57BL/6J WT (n = 2 each)<br>RL: C57BL/6J MUT vs C57BL/6J WT (n = 4 each) | Johnson et al.<br><i>Nature Med.</i> 2017 |
| N. Cortical Excitatory Neurons (T158M, <b>Male</b> )        | BL: C57BL/6J WT vs C57BL/6J WT (n = 2 each)<br>RL: C57BL/6J MUT vs C57BL/6J WT (n = 4 each) | Johnson et al.<br><i>Nature Med.</i> 2017 |
| O. Cortical Inhibitory Neurons (R106W, <b>Male</b> )        | BL: C57BL/6J WT vs C57BL/6J WT (n = 2 each)<br>RL: C57BL/6J MUT vs C57BL/6J WT (n = 4 each) | Johnson et al.<br><i>Nature Med.</i> 2017 |
| P. Cortical Inhibitory Neurons (T158M, <b>Male</b> )        | BL: C57BL/6J WT vs C57BL/6J WT (n = 2 each)<br>RL: C57BL/6J MUT vs C57BL/6J WT (n = 4 each) | Johnson et al.<br><i>Nature Med.</i> 2017 |
| Q Excitatory Neurons (T158M <sub>WT</sub> , <b>Female</b> ) | BL: C57BL/6J WT vs C57BL/6J WT (n = 1 each)<br>RL: C57BL/6J MUT vs C57BL/6J WT (n = 2 each) | Johnson et al.<br><i>Nature Med.</i> 2017 |

683  
684 **Figure S5 (Related to Figure 3).** Differentially expressed gene analysis using gene list from Baker et al.,  
685 2013 on *Mecp2* hippocampus dataset. Scatter plot of log fold-change ( $\log_2\text{FC} > 0.1$  and FDR < 0.05) in  
686 expression between FVBx129 KO to its FVBx129 WT littermates (y-axis) against its gene length (x-axis)  
687 in samples of hippocampus from 4-week old and 9-week old mice (n = 4; (Baker et al., 2013)).

688

689 **Figure S6 Long gene bias in the SEQC dataset (Related to Figure 4).** (A) Brain vs. Brain randomized  
690 log fold-change plot against gene length (left panel; n = 32 each), Universal human reference (UHR) vs  
691 UHR randomized log fold-change plot against gene length (middle panel; n = 32 each) and log<sub>2</sub> fold-  
692 change plot against transcript length using  $\beta$  ratio samples in RNA-Seq dataset (right panel; n = 32 each).  
693 (B) Brain vs. Brain randomized fold-change plot against gene length (left panel; n = 2 each), Universal  
694 human reference (UHR) vs UHR randomized log fold-change plot against gene length (middle panel; n=2  
695 each) and log<sub>2</sub> fold-change plot against transcript length using  $\beta$  ratio samples in microarray dataset (right  
696 panel; n = 2 each). Each blue dot is a bin of 200 genes with shift size of 40 genes (Gabel et al., 2015).  
697

698 **Figure S7 Long gene bias is independent of normalization methods (Related to Figure 4).** Log<sub>2</sub> fold-  
699 change plot against gene length using  $\beta$  ratio samples (n =64 each) for all genes using (A) library size  
700 normalization (or total count) against gene length (left panel) & transcript length (right panel) and (B)  
701 TMM (edgeR) normalization against gene length (left panel) & transcript length (right panel). Each blue  
702 dot is a bin of 200 genes with shift size of 40 genes (Gabel et al., 2015).  
703

704 **Figure S8 Long gene bias is not observed in Nanostring dataset (Related to Figure 4).** (A) PCA plot  
705 on the NanoString dataset (n = 6 each sample type). (B) Scatter plot for mean gene expression in brain  
706 samples against its gene length (C) brain vs. brain randomized fold-change plot against gene length (n = 6  
707 each). (D) Log<sub>2</sub> fold-change plot against gene length using (B-A/C-A) = 4:1 samples (n =6 each).  
708

709 **Figure S9 Explanation of reciprocal relationship among transcriptional changes between RTT and**  
710 **MECP2 duplication syndrome.** (A) PCA Plot of the B samples in Novartis SEQC dataset using library  
711 prep IDs. (B) Comparison of brain samples having library preparation 1 vs 2 against gene length (n = 16  
712 each). (C) Comparison of brain samples having library preparation 3 vs 2 against gene length (n = 16  
713 each). (D) Differential expression analysis between brain samples having library preparation id 1 vs 2 and  
714 3 vs 2 across different fold changes and FDR < 0.05. Each blue dot is a bin of 200 genes with shift size of  
715 40 genes (Gabel et al., 2015). The red and blue dot in (D) represent long and short genes, respectively.  
716

717 **Figure S10 RNA-Seq and Nanostring analysis of Mecp2 KO and WT samples from the cerebellum**  
718 **of male mice (Related to Figure 5).** A) Analysis using all the genes in the RNA-Seq cerebellum dataset.  
719 PCA Plot of Mecp2 KO and WT samples (left panel), overlap plot (middle panel) where, blue line (BL)  
720 represents the comparison of permuted WT/WT samples from a respective dataset (n = 1 each). The Red  
721 line (RL) represents the comparison of KO samples to its WT littermates (n = 3 each). The top half of



722 each subgraph shows the lines that represent fold-change in expression for genes binned according to  
723 gene length (bin size of 200 genes with shift size of 40 genes) as described (Gabel et al., 2015). The blue  
724 and red ribbon correspond to one-half of one standard deviation of each bin for the comparison of  
725 WT/WT and KO/WT respectively. The bottom half of each subgraph is the p-value from the two-sample  
726 t-test between KO/WT and WT/WT. Bins with  $FDR < 0.05$  are shown in red. The red dotted line  
727 indicates the minimum  $-\text{Log}_{10}(\text{p-value})$  that corresponds to a  $FDR < 0.05$ . Scatter plot of log fold-change  
728 in expression between KO and WT samples (right panel;  $n = 3$  each) against gene length. The  
729 differentially expressed genes ( $FDR < 0.05$  & absolute  $\log_2\text{FC} > \log_2(1.2)$ ) were plotted. B) Analysis  
730 using 750 genes common in both RNA-Seq and Nanostring dataset. PCA plot of Mecp2 KO and WT  
731 samples ( $n = 3$  each) by RNA-Seq (left panel) and Nanostring (right panel) platforms. C) Comparison of  
732  $\log_2$  fold changes using classical/standard method (left panel) and shrunken  $\log_2$  fold changes (right  
733 panel) using DESeq2.

734 **STAR METHODS**

735

736 **KEY RESOURCES TABLE**

737

738 Deposited Data

739

740 Table 1 has all details about the datasets used in the analysis with GEO Accession IDs.

741

742 Software and Algorithms

743

744

| Reagent or Resource    | Source                                                                | Identifier                                                                                                                                                      |
|------------------------|-----------------------------------------------------------------------|-----------------------------------------------------------------------------------------------------------------------------------------------------------------|
| STAR aligner (v2.4.2a) | Dobin et al., 2013                                                    | <a href="https://github.com/alexdobin/STAR/releases/tag/STAR_2.4.2a">https://github.com/alexdobin/STAR/releases/tag/STAR_2.4.2a</a>                             |
| DESeq2                 | Love et al., 2014                                                     | <a href="https://bioconductor.org/packages/release/bioc/html/DESeq2.html">https://bioconductor.org/packages/release/bioc/html/DESeq2.html</a>                   |
| edgeR                  | Robinson et al., 2010                                                 | <a href="https://bioconductor.org/packages/release/bioc/html/edgeR.html">https://bioconductor.org/packages/release/bioc/html/edgeR.html</a>                     |
| NanoStringNorm         | Waggott et al., 2012                                                  | <a href="https://cran.r-project.org/web/packages/NanoStringNorm/index.html">https://cran.r-project.org/web/packages/NanoStringNorm/index.html</a>               |
| GenomicFeatures        | Lawrence et al., 2013                                                 | <a href="https://bioconductor.org/packages/release/bioc/html/GenomicFeatures.html">https://bioconductor.org/packages/release/bioc/html/GenomicFeatures.html</a> |
| ggplot2                | Hadley Wickham.<br>ggplot2: Elegant Graphics for Data Analysis (2010) | <a href="https://github.com/tidyverse/ggplot2">https://github.com/tidyverse/ggplot2</a>                                                                         |
| cowplot                | CRAN Package                                                          | <a href="https://github.com/wilkelab/cowplot">https://github.com/wilkelab/cowplot</a>                                                                           |

745

746

747 **CONTACT FOR REAGENT AND RESOURCE SHARING**

748

749 Further information and requests for resources and reagents should be directed to and will be fulfilled by  
750 the Lead Contact, Zhandong Liu ([zhandong.liu@bcm.edu](mailto:zhandong.liu@bcm.edu)).

751

752

753 **EXPERIMENTAL MODELS AND SUBJECT DETAILS**

754

755 **Mice**

756 All mice used in this study were FVB.129 F1-hybrids. They were group-housed with up to five

757 mice per cage. They were maintained on a 14h light:10h dark cycle (light on at 06:00) with standard

758 mouse chow and water *ad libitum* in our AAALAS-accredited facility. All research and animal care

759 procedures were approved by the Baylor College of Medicine Institutional Animal Care and Use  
760 Committee.

761

## 762 **METHOD DETAILS**

763

### 764 **Analysis of *Mecp2* datasets**

765 The transcriptome datasets from *Mecp2* studies generated using microarray (GEO accession ids:  
766 GSE50225, GSE11150, GSE15574, GSE33457, GSE42895, GSE42987, GSE8720 and GSE6955) were  
767 downloaded from GEO. RMA function (Gautier et al., 2004; Irizarry et al., 2003) in the R “affy” package  
768 was used to perform background correction, normalization, and summarization of core probesets. NetAffx  
769 annotation files (Release 33 for mm9) was used to map affy probes to its official gene symbols. The  
770 expression values for genes with multiple probes were obtained by taking the average  $\log_2$  expression  
771 value across all the probes corresponding to each gene. The NetAffx annotation file has information about  
772 the probe location, length and gene coordinates; we calculated gene length using the gene coordinates,  
773 and we specifically used gene length in all our figures where “Gene length in KB” is defined on the x-  
774 axis. We also ran our analysis on the transcript length (see figures S5A-B, right panel, and S6A-B, right  
775 panel). The extent of length-dependent bias with transcript length was similar to that of gene length. Since  
776 gene length information was not available in case of Affymetrix Human Genome U95 version 2 array, we  
777 mapped the probe to its gene and gene length using Ensembl Biomart database (version  
778 GRCh38.p5/Ensembl Genes 84).

779 The transcriptome dataset of the virtual cortex (Gabel et al., 2015) (GSE60077) was mapped to  
780 mm10 genome using STAR aligner v2.4.2a (Dobin et al., 2013) and for hypothalamus RNA-Seq dataset  
781 (Chen et al., 2015) (GSE66871), we used a published list of differentially expressed genes and normalized  
782 counts. For Johnson et al. (Johnson et al., 2017) RNA-Seq dataset (GSE83474), we used the raw count  
783 files provided by the authors in GEO. Similarly, for the transcriptome analysis of frontal and temporal  
784 cortex from RTT patients, we used the normalized gene expression profile provided in GSE75303 (Lin et  
785 al., 2016). We performed box plot and MDS plot to check for outliers in the sample distribution. The  
786 annotation files provided by GPL10558 were obtained to map Illumina probes to official gene symbols  
787 and RefSeq hg19 annotation was used to obtain gene length information.

788

### 789 **Running Average Plots**

790 We used the same method as described in (Gabel et al., 2015) to compute the running average  
791 plot. In brief, the genes were sorted by their lengths and partitioned into bins using a sliding window of  
792 200 consecutive genes in steps of 40 genes. The  $\log_2$  fold-change values for genes within each bin were

793 averaged. For consistency with the previous studies, we used genes whose lengths are between 1 kb and  
794 1000 kb for all the plots. These plots were created using ggplot2 package in R.

795

### 796 **Confidence interval estimation in Overlap plots**

797 We define the plots used in Figure 1 as “overlap plots”, meaning an overlap of two running  
798 average plots that shows intra-sample variation between control samples (WT) and inter-sample variation  
799 between two genotypes or conditions. To determine the amount of intra-sample variation, we computed  
800 the standard deviation of the genes in the same sliding window. By definition, 95% confidence interval  
801 for the mean is sample mean plus minus 1.96 times of the standard deviation. In all our overlap plots for  
802 the *Mecp2* datasets, however, the confidence interval of KO/WT (or Tg/WT or D/V or RTT/WT) and  
803 WT/WT completely overlap. For the sake of legibility, we plotted only half of one standard deviation of  
804 the mean for each bin in the comparison of WT/WT and KO/WT (or Tg/WT or D/V or RTT/WT), which  
805 is denoted by the blue and red ribbon, respectively. Two-sample Student t-test was applied to each of the  
806 bins between KO/WT (or Tg/WT or D/V or RTT/WT) and WT/WT, followed by multiple hypothesis  
807 adjustment using the Benjamini-Hochberg method (FDR). The significant bins ( $FDR < 0.05$ ) are denoted  
808 by red and non-significant bins are denoted by grey. The overlap plots were created using cowplot  
809 package in R.

810

### 811 **Distribution of differentially expressed genes in *Mecp2* datasets**

812 To measure the distribution of long gene bias among differentially expressed genes, we extracted  
813 published lists of genes found to be significantly activated or repressed by *Mecp2* across different brain  
814 region. The published lists of differentially expressed genes were downloaded from the supplementary  
815 files in each study. Because of the frequent changes in gene name and annotation, we used MGI batch  
816 query (Eppig et al., 2015) to facilitate uniform comparison between these gene lists. The genomic  
817 locations were obtained for mm10/GRCm38. The original fold-change and FDR thresholds reported by  
818 respective publications were used. In case of microarray datasets, genes were plotted against their length.  
819 In the case of the RNA-Seq dataset, the calculation was done based on UCSC transcript IDs. Long genes  
820 (gene length > 100 Kb) were represented as red and short genes were represented as blue. The numbers of  
821 the upregulated and downregulated long/short genes are shown in four different quadrants.

822

### 823 **Analysis of SEQC dataset**

824 We measured the long gene fold-change bias in RNA-Seq and microarray benchmark datasets,  
825 using the RNA-Seq datasets generated by all the Illumina HiSeq 2000 sites and microarray datasets  
826 generated by USF using Affymetrix Human Gene 2.0 ST Array in the SEQC consortium. The RNA-Seq

827 raw count files and microarray PrimeView normalized file were accessed from the Gene Expression  
828 Omnibus database (GEO) (Barrett et al., 2013). The GEO accession IDs for the RNA-Seq and microarray  
829 datasets are GSE47774 and GSE56457, respectively. Raw count files from the Australian Genome  
830 Research Facility (AGR), Beijing Genomics Institute (BGI), Weill Cornell Medical College (CNL), City  
831 of Hope (COH), Mayo Clinic (MAY) and Novartis (NVS) were normalized using the DESeq2 method.  
832 Principal Component Analysis (PCA) and Multidimensional scaling plots (using Euclidean distance) were  
833 used to do a sanity check for a nominal amount of batch effects.

834 For further downstream analysis, we decided to use the Novartis dataset, as it had a minimal  
835 amount of non-biological variation (data not shown). The Novartis dataset consisted of 64 technical  
836 samples each of A (Universal Human Reference RNA), B (Human Brain Reference RNA), C (3A:1B)  
837 and D (1A:3B). We did not use sample type E (Ambion ERCC Spike-In Control Mix 1) or F (Ambion  
838 ERCC Spike-In Control Mix 2) in our analysis. For consistency with the SEQC consortium, we used  
839 hg19 iGenome NCBI/RefSeq annotation (build 27.2). The *transcripts* and *exon* functions in  
840 GenomicFeatures Bioconductor package (Lawrence et al., 2013) were used to obtain the gene and  
841 transcript length respectively, from the hg19 GTF file. Since a small number of genes or transcripts have  
842 multiple different genomic locations, genes or transcripts with the longest length were used. Expression  
843 values for genes with multiple transcript clusters were averaged across all transcript clusters  
844 corresponding to each gene. Similarly, for the microarray USF PrimeView dataset, sanity checks were  
845 performed using boxplot and MDS plots. Boxplots were used to check if the dataset was properly  
846 normalized and MDS plots were used to confirm that the dataset had a nominal amount of batch effects or  
847 non-biological variation.

848

#### 849 **Library size normalization using Total Count and Trimmed Mean of M-values**

850 To ensure that our normalization methods were not obscuring a genuine long gene bias, we  
851 normalized the raw counts from Novartis RNA-Seq dataset based on two other methods apart from  
852 DESeq2 (Love et al., 2014): a) Total Counts (Dillies et al., 2013) and b) the Trimmed Mean of M-values  
853 (TMM) method implemented in edgeR (Robinson et al., 2010; Robinson and Oshlack, 2010). For Total  
854 Counts, scaling factors were computed such that the normalized read counts across all samples are equal.  
855 In the case of the TMM method, we used the *calcNormFactors* function in the edgeR Bioconductor  
856 package to get the scaling factors and normalized read counts.

857

#### 858 **SEQC NanoString sample preparation and analysis**

859 We purchased Universal Human Reference RNA from Agilent Technologies, Inc., and Human  
860 Brain Reference RNA from Life Technologies, Inc. For the nCounter experiments, we used the same

861 RNA sample types as SEQC. We assessed RNA purity and integrity with Bioanalyzer (Agilent  
862 Technologies, Inc.) prior to use in the nCounter assays. Sample preparation and analysis were done using  
863 a nCounter Prep Station 5s and a nCounter Digital Analyzer 5s. Expression of 770 genes (~730 genes  
864 with ~40 housekeeping genes and positive and negative controls) was assessed using the nCounter  
865 Human PanCancer Pathways Panel. A second PanCancer Pathways Panel was run using the same samples  
866 submitted to the first panel to assess the effect of batches on nCounter results. We used NanoStringNorm  
867 function (Waggott et al., 2012) in the R NanoStringNorm package to normalize the dataset. Boxplots and  
868 MDS plots were used for sanity checks. The two-sided Wilcoxon rank sum test was used to compare the  
869 distribution of the fold-change between long and short genes across the three different platforms.

870

### 871 **RNA isolation, sequencing and nanostring analysis from mouse cerebellum**

872 We performed RNA extraction and purification from the cerebellum of male mice 8 to 9 weeks of  
873 age (three biological replicates of wild-type and *Mecp2*-null) using the Aurum™ Total RNA Fatty and  
874 Fibrous Tissue Kit (Bio-Rad 7326830) per the manufacturer's instructions. Genomic DNA was  
875 eliminated using an on-column DNase digestion step. RNA quality was assessed using the Agilent 2100  
876 Bioanalyzer system prior to library preparation for deep sequencing or use of the total RNA for  
877 Nanostring nCounter quantification.

878 RNA sequencing was performed using Illumina HiSeq 2000. All sequencing was done by the  
879 Genomic and RNA Profiling Core at the Baylor College of Medicine. For each sample, about 90 to 110  
880 million pairs of 100 bp reads were generated. Raw reads were aligned to the *Mus musculus* genome  
881 (Gencode mm10; version M10) using STAR aligner v2.4.2a (Dobin et al., 2013) with default parameters.  
882 The overall mappability for all 6 samples was above 90% (Table 2). The read counts per gene were  
883 obtained using the *quantMode* function in STAR. These read counts are analogous to the expression level  
884 of the gene. Using the obtained raw counts, normalization and differential gene analysis were carried out  
885 using the DESeq2 package in the R environment. DESeq2 allows us to test for gene expression changes  
886 between samples in different conditions using more robust shrinkage estimation for dispersion and fold  
887 changes (Love et al., 2014). The default negative binomial generalized linear model with Wald test  
888 implemented in the package was used to identify significant differential expressed genes. Log fold -  
889 change was calculated using both the classic method and shrinkage estimates calculated by DESeq2.

890 For the nCounter experiments, sample preparation and quality analysis were done using a  
891 nCounter Prep Station 5s and an nCounter Digital Analyzer 5s. Expression of 784 genes (750 endogenous  
892 genes with 34 housekeeping genes and positive and negative controls) was assessed using the nCounter  
893 Mouse PanCancer Pathways Panel. We used NanoStringNorm function (Waggott et al., 2012) in the R  
894 NanoStringNorm package to normalize the dataset and DESeq2 for differential expression analysis.

**Figure 1****A 300nM Topotecan Treatment**

Cultured Cortical Neurons (RNA-Seq, King et al.)  
 Cultured Cortical Neurons (RNA-Seq, King et al.)  
 Cultured Cortical Neurons (RNA-Seq, Mable et al.)

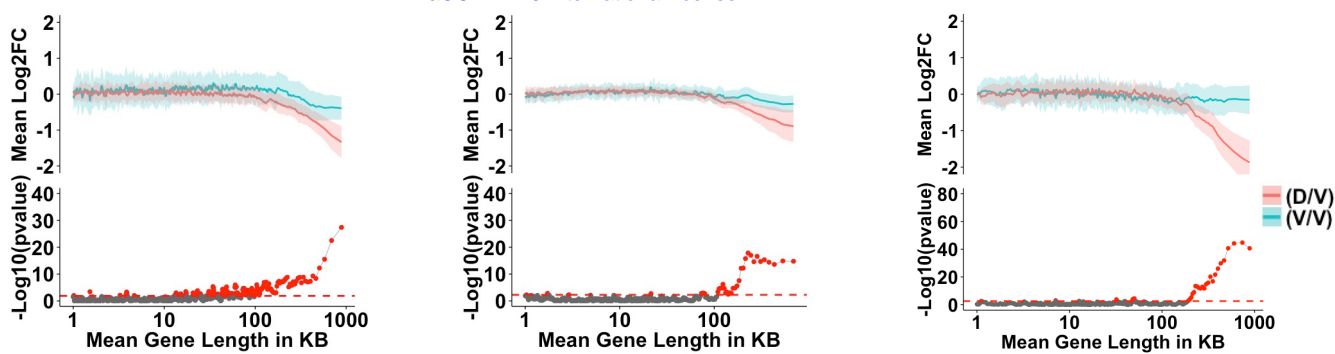**B Mecp2 (KO/WT) Male Mouse Models**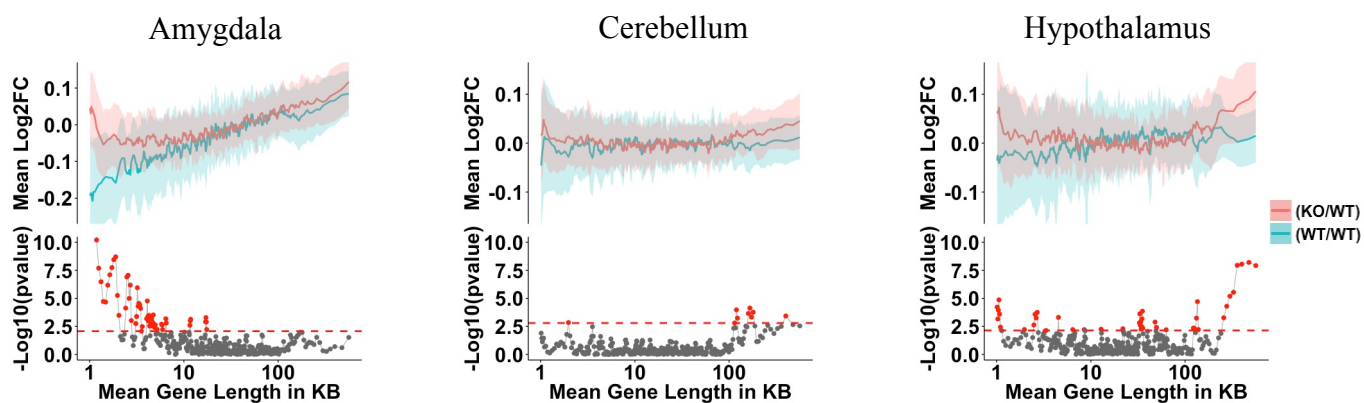**C Mecp2 (Tg/WT) Male Mouse Models**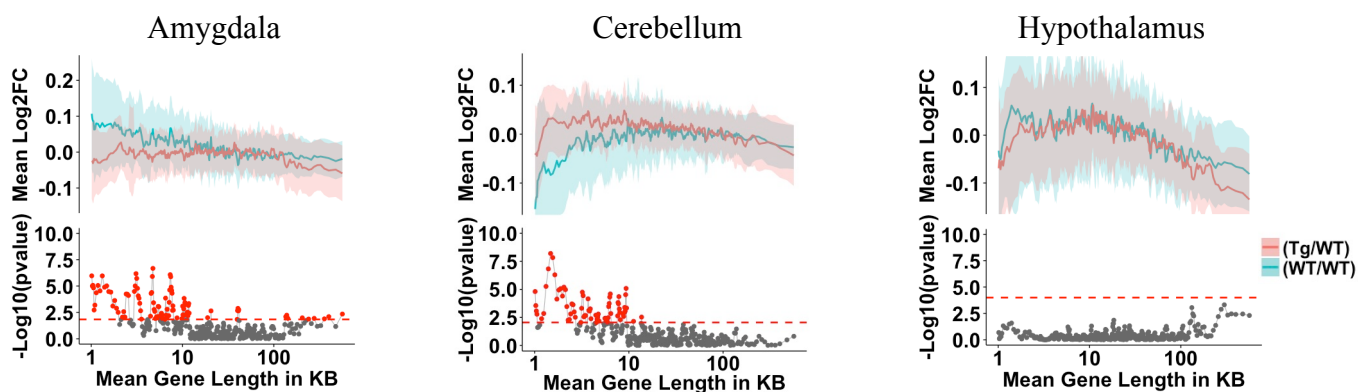**D Mecp2 (MUT/WT) Female Mouse Models**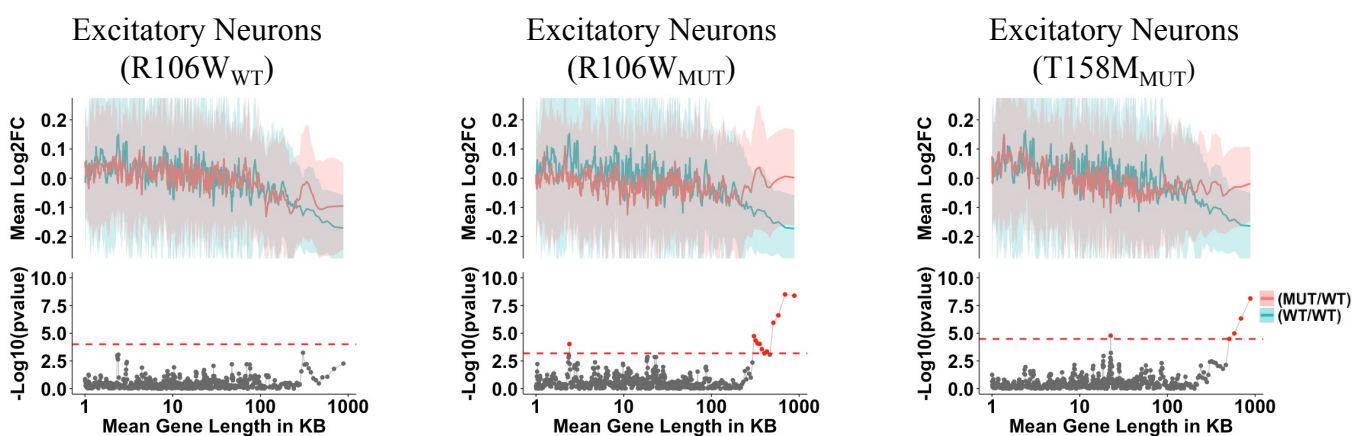

**Figure 2****A Lowry's Human RTT *in vitro* Dataset**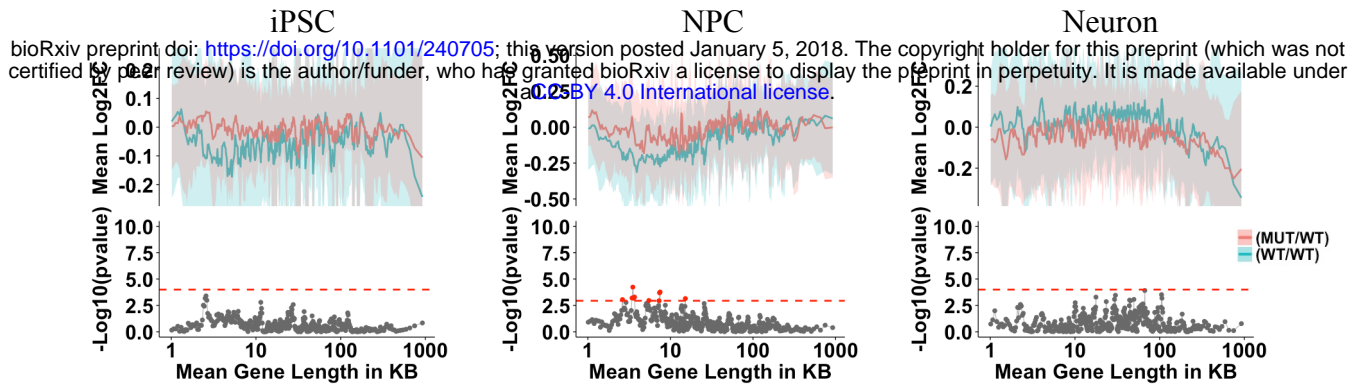**B Deng's Dataset (RTT/WT)**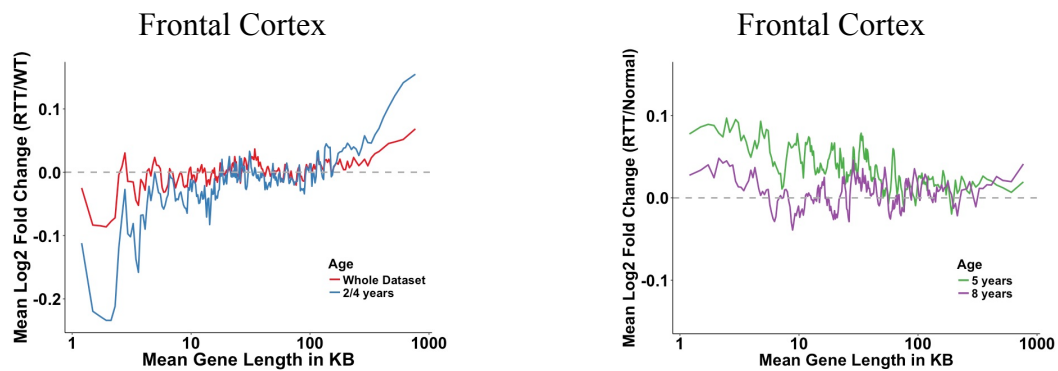**C Lin's Dataset (RTT/WT)**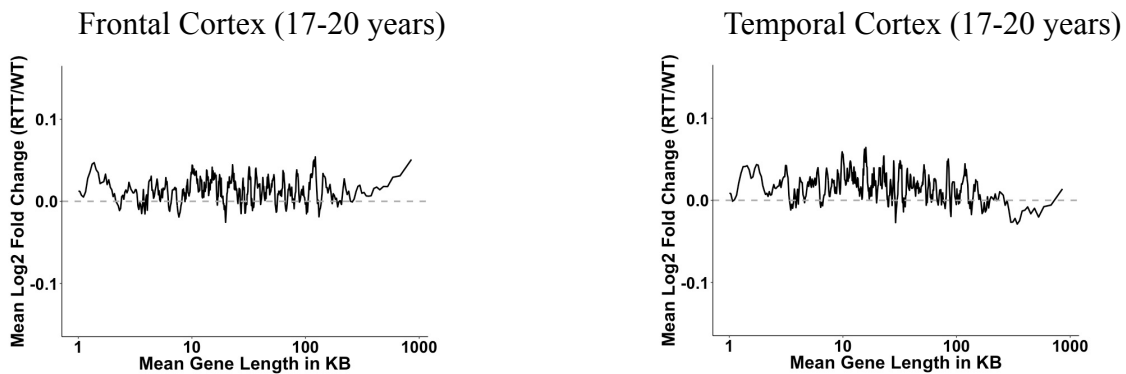**D Lowry's Human RTT Dataset (RTT/WT)**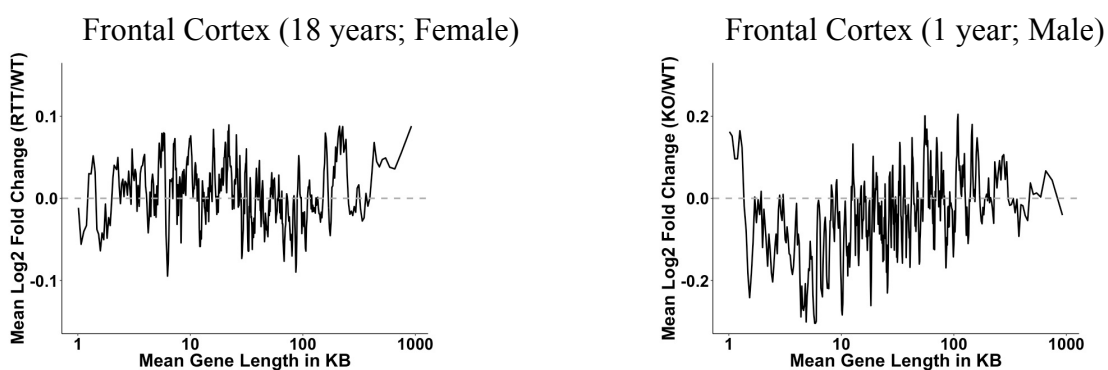



**Figure 3****A 300nM Topotecan Treatment RNA-Seq Datasets**

bioRxiv preprint doi: <https://doi.org/10.1101/240795>; this version posted January 5, 2018. The copyright holder for this preprint (which was not certified by peer review) is the author/funder, who has granted bioRxiv a license to display the preprint in perpetuity. It is made available under aCC-BY 4.0 International license.

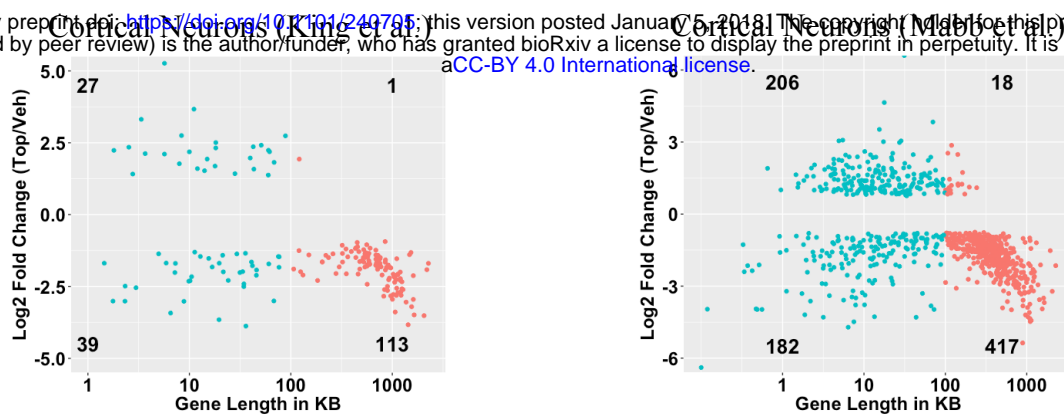**B Mecp2 related Array (KO/WT) Datasets**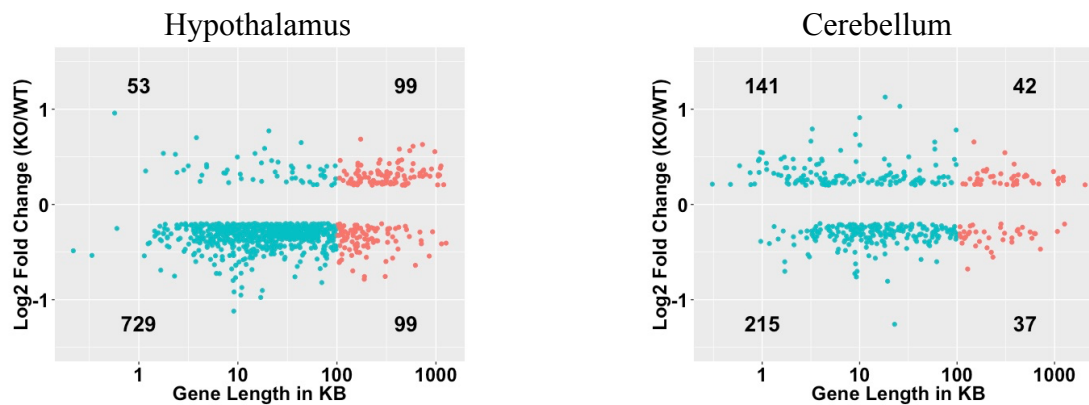**C Mecp2 related Array (Tg/WT) Datasets**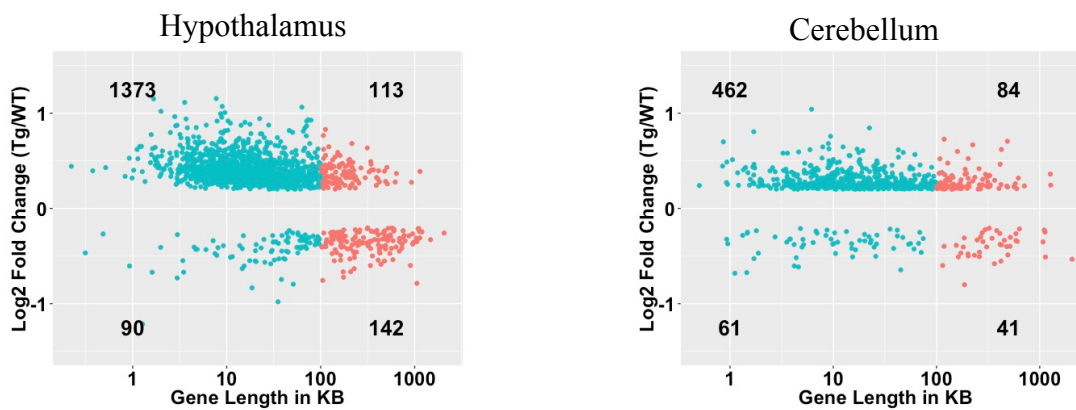**D Mecp2 related Seq Datasets**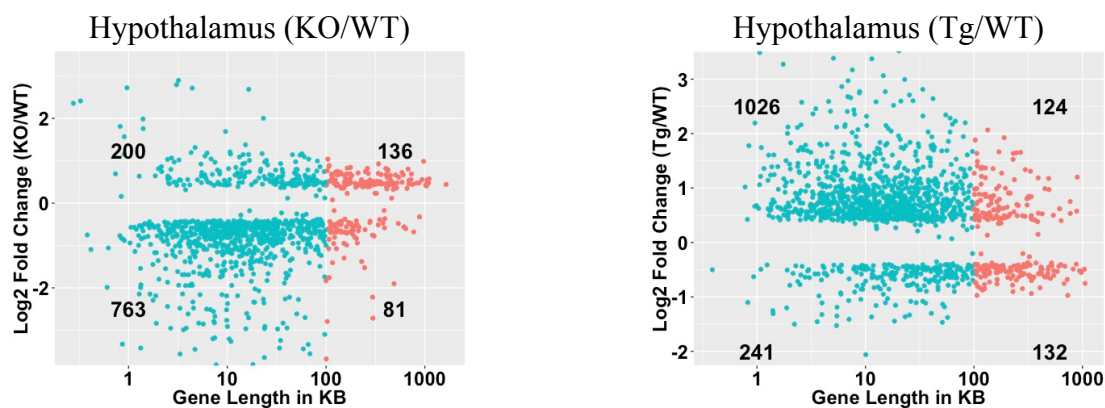

**Figure 4****SEQC RNA-Seq**

bioRxiv preprint doi: <https://doi.org/10.1101/240705>; this version posted January 5, 2018. The copyright holder for this preprint (which was not certified by peer review) is the author/funder, who has granted bioRxiv a license to display the preprint in perpetuity. It is made available under aCC-BY 4.0 International license.

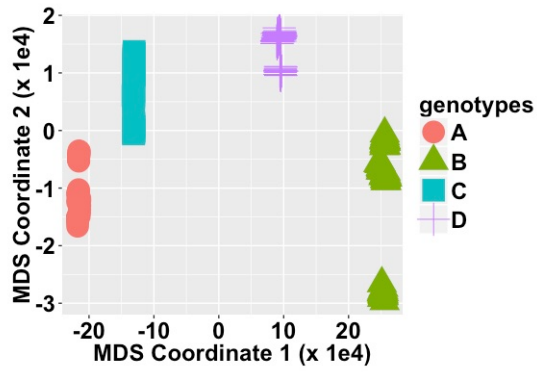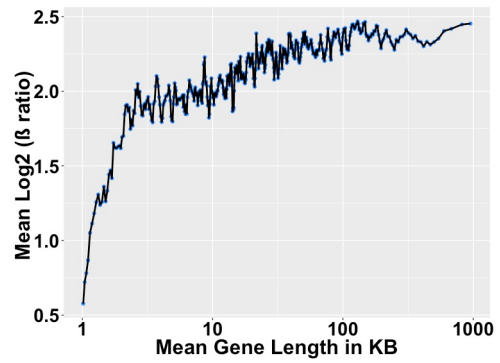**SEQC Array**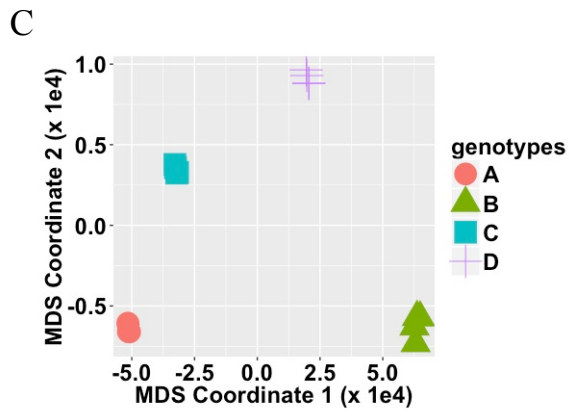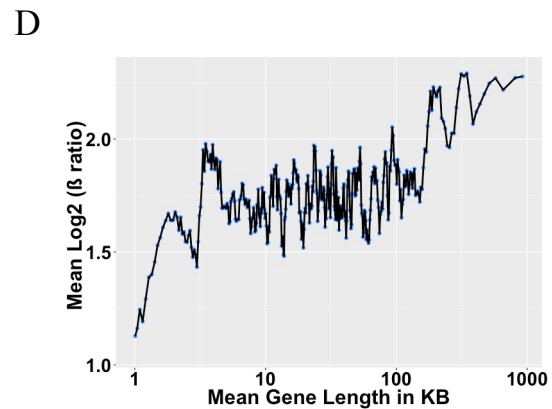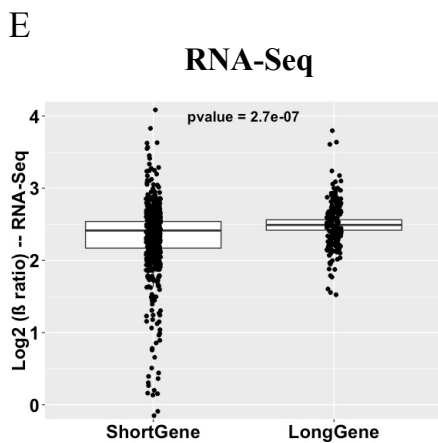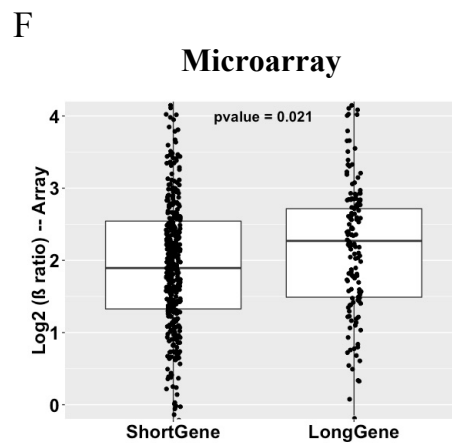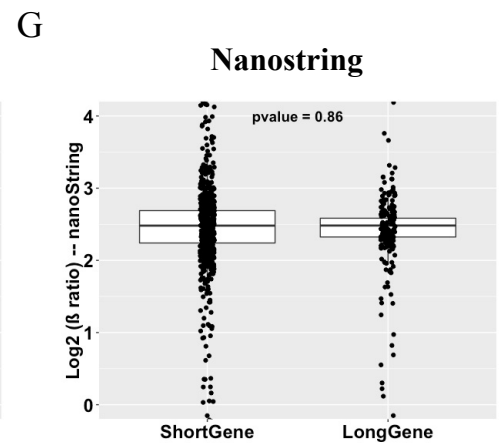

# Figure 5

A bioRxiv preprint doi: <https://doi.org/10.1101/240705>; this version posted January 5, 2018. The copyright holder for this preprint (which was not certified by peer review) is the author/funder, who has granted bioRxiv a license to display the preprint in perpetuity. It is made available under aCC-BY 4.0 International license.

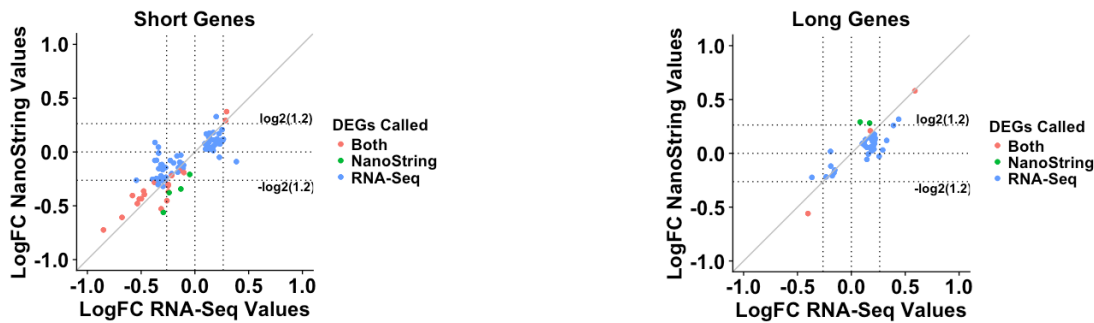

C

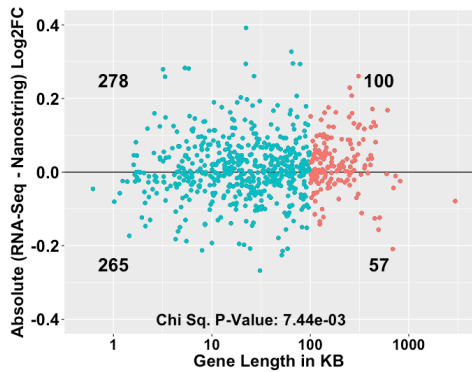

**Figure S1**

bioRxiv preprint doi: <https://doi.org/10.1101/240705>; this version posted January 5, 2018. The copyright holder for this preprint (which was not certified by peer review) is the author/funder, who has granted bioRxiv a license to display the preprint in perpetuity. It is made available under aCC-BY 4.0 International license.

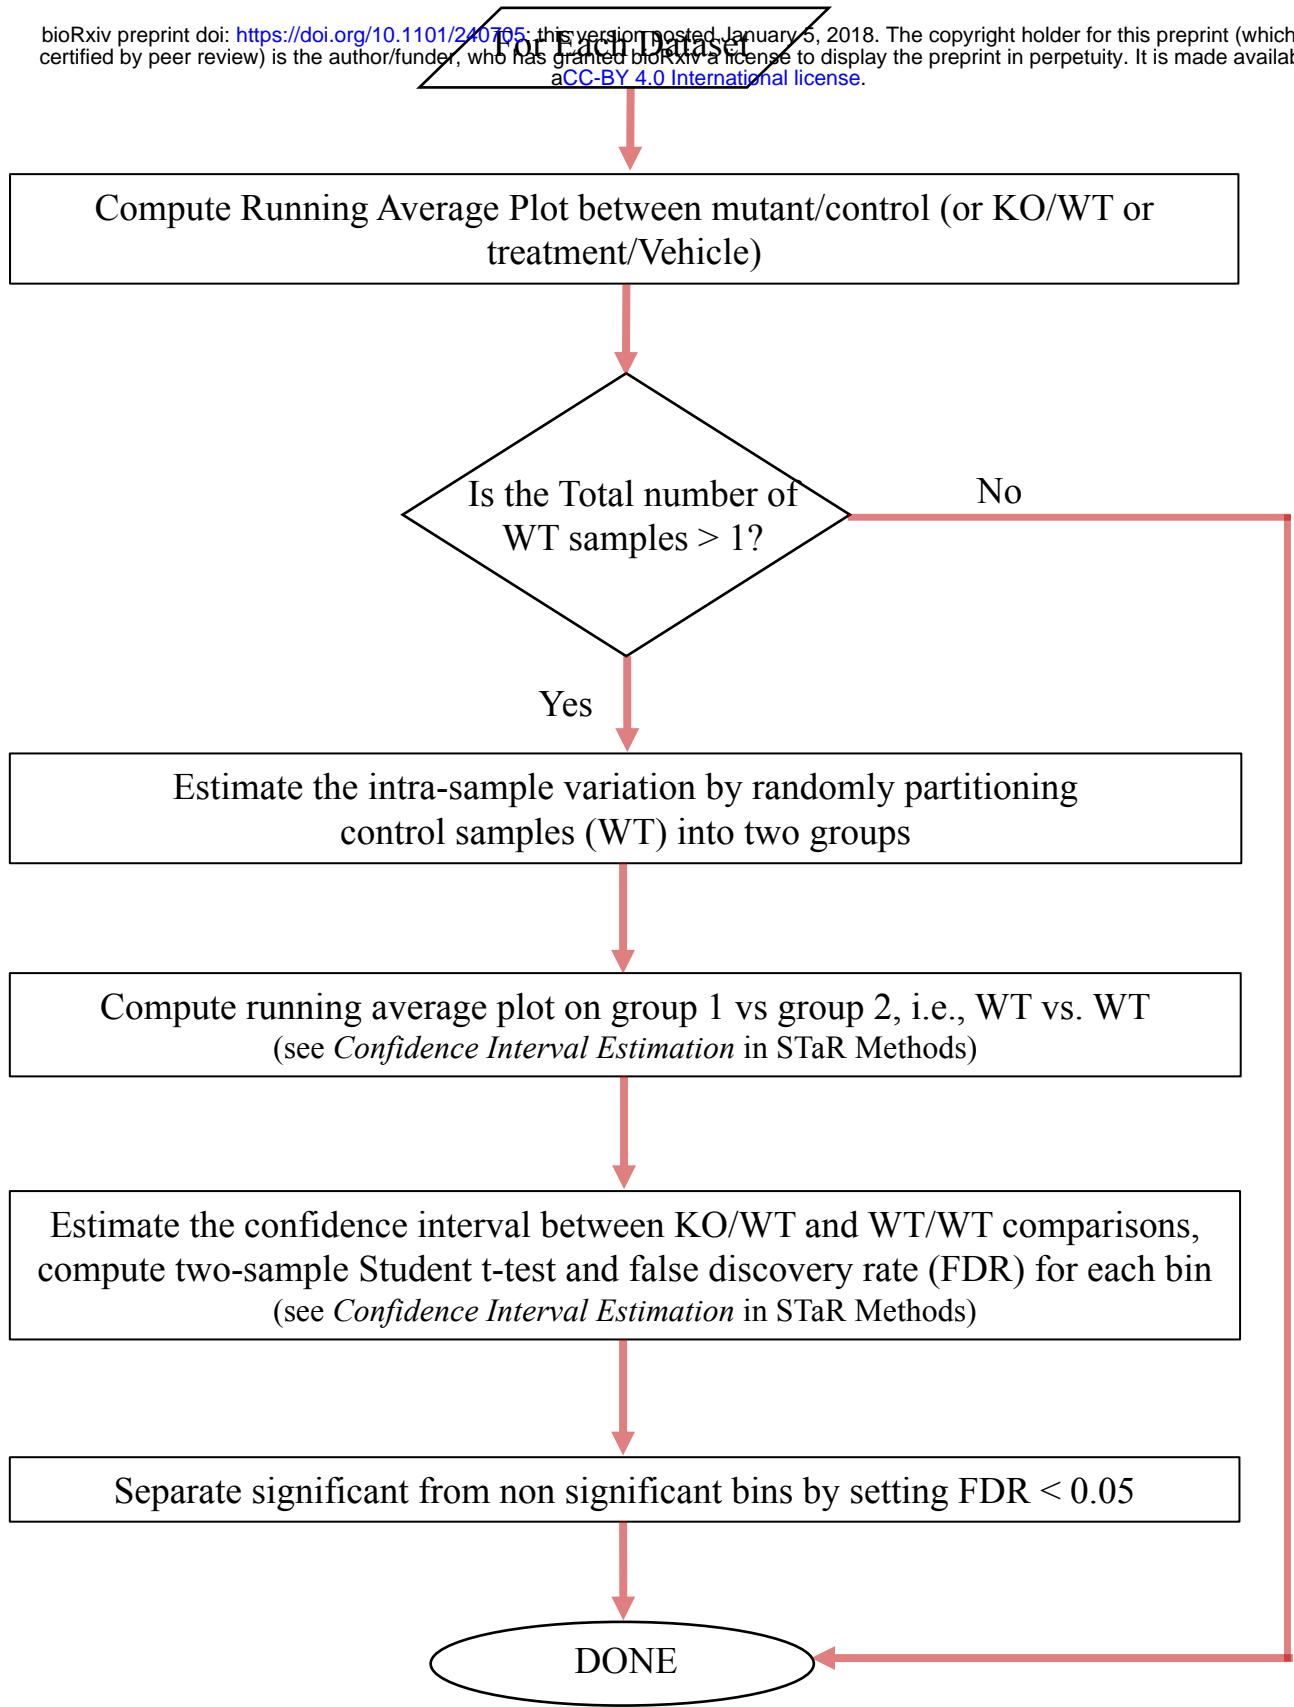

**Fig. S1: Schematic for rigorous assessment of long gene trends**

Figure S2

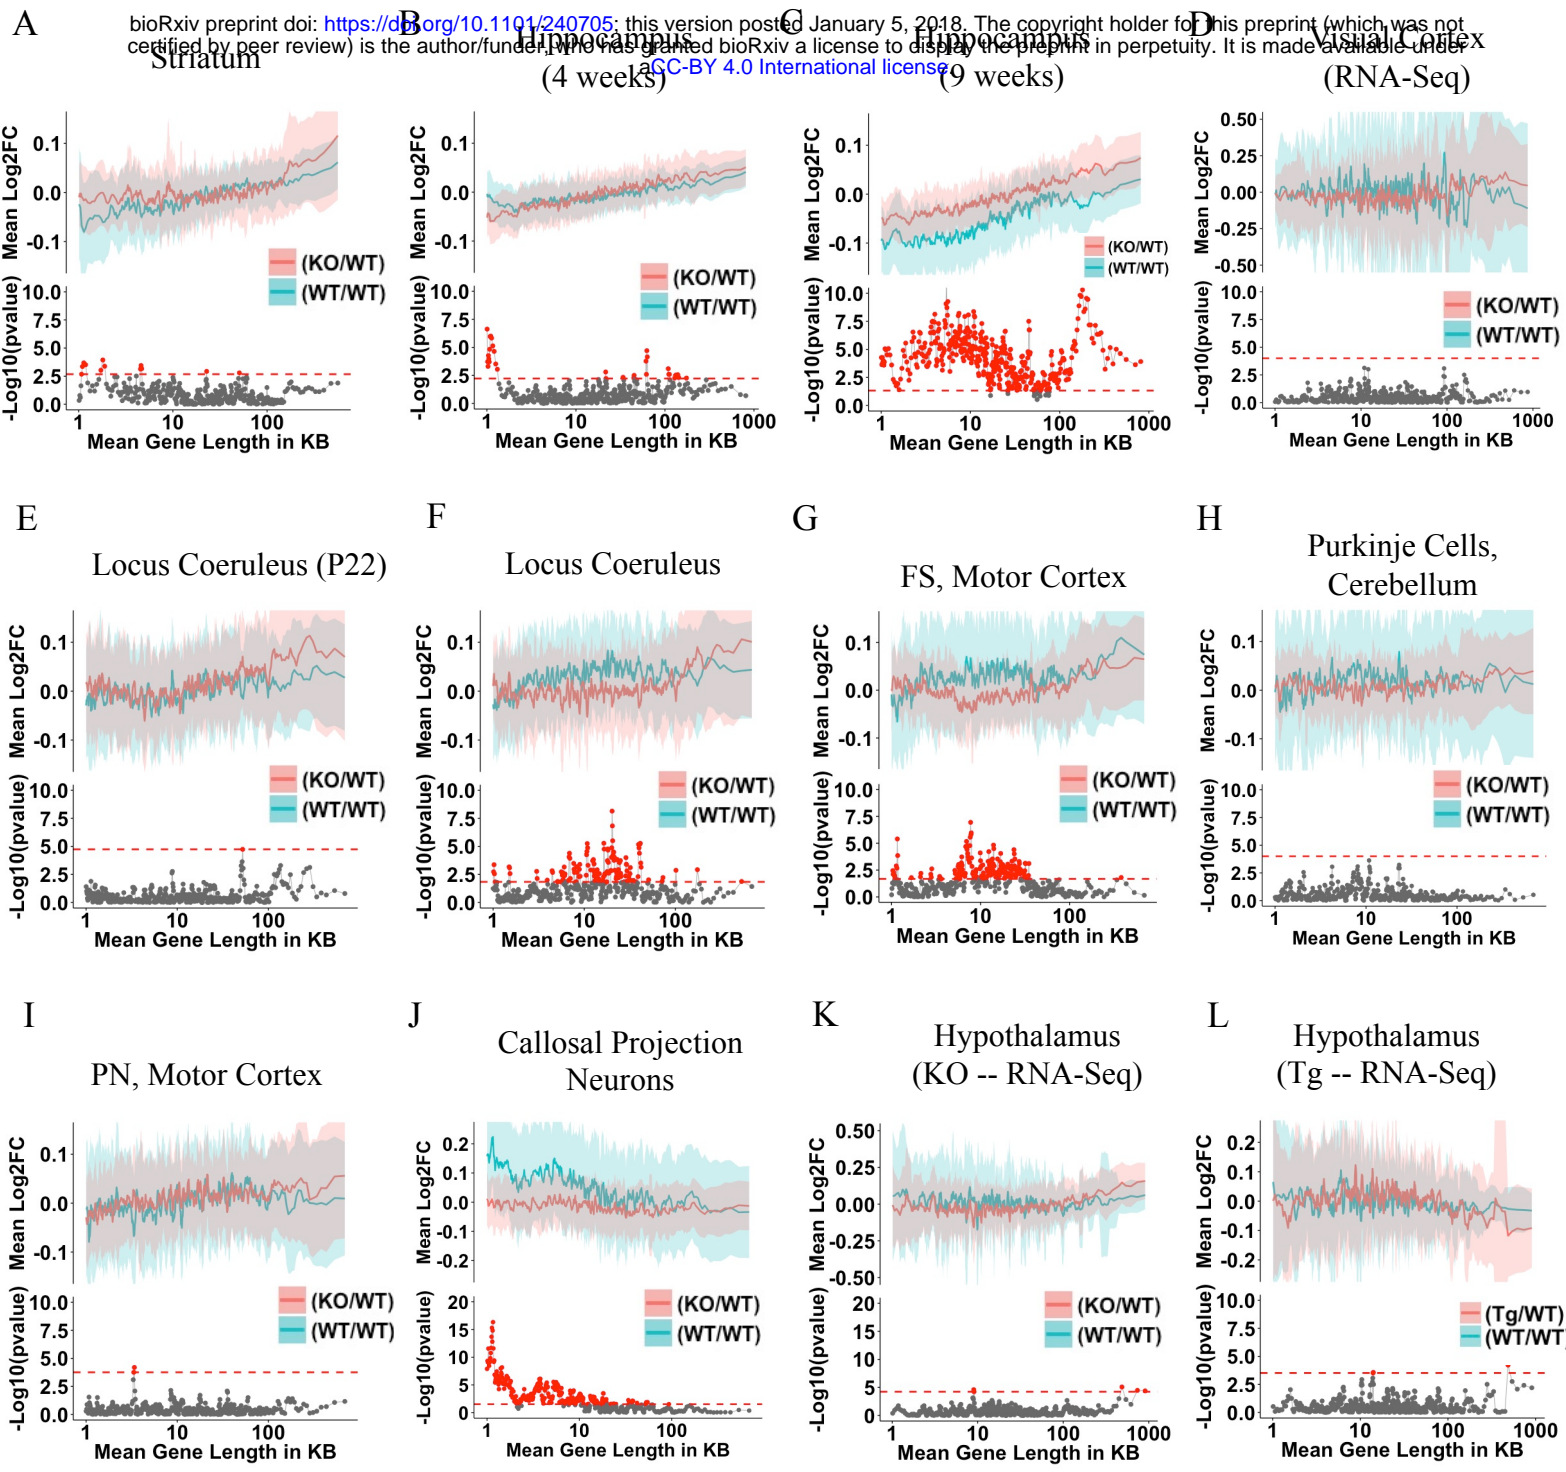

**Figure S3**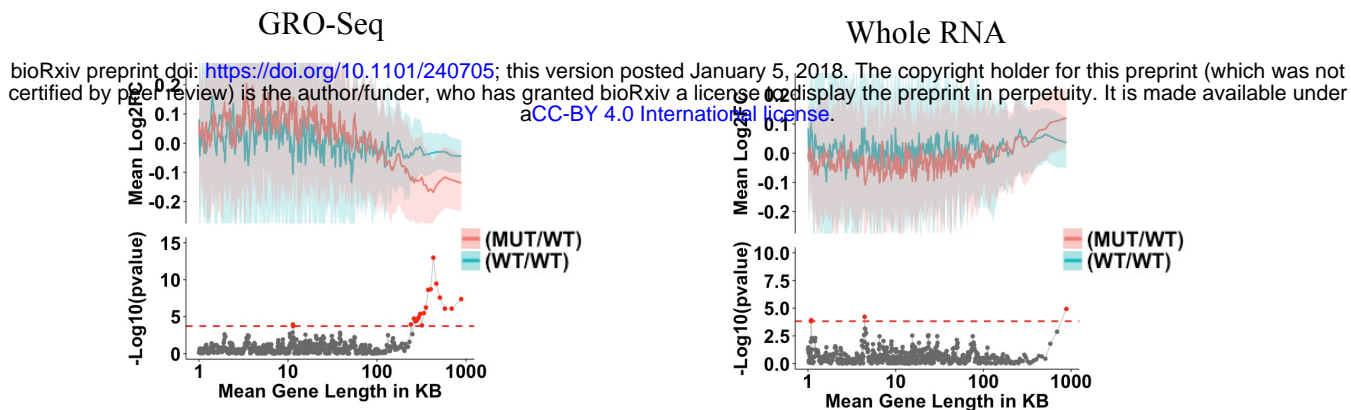**Figure S4**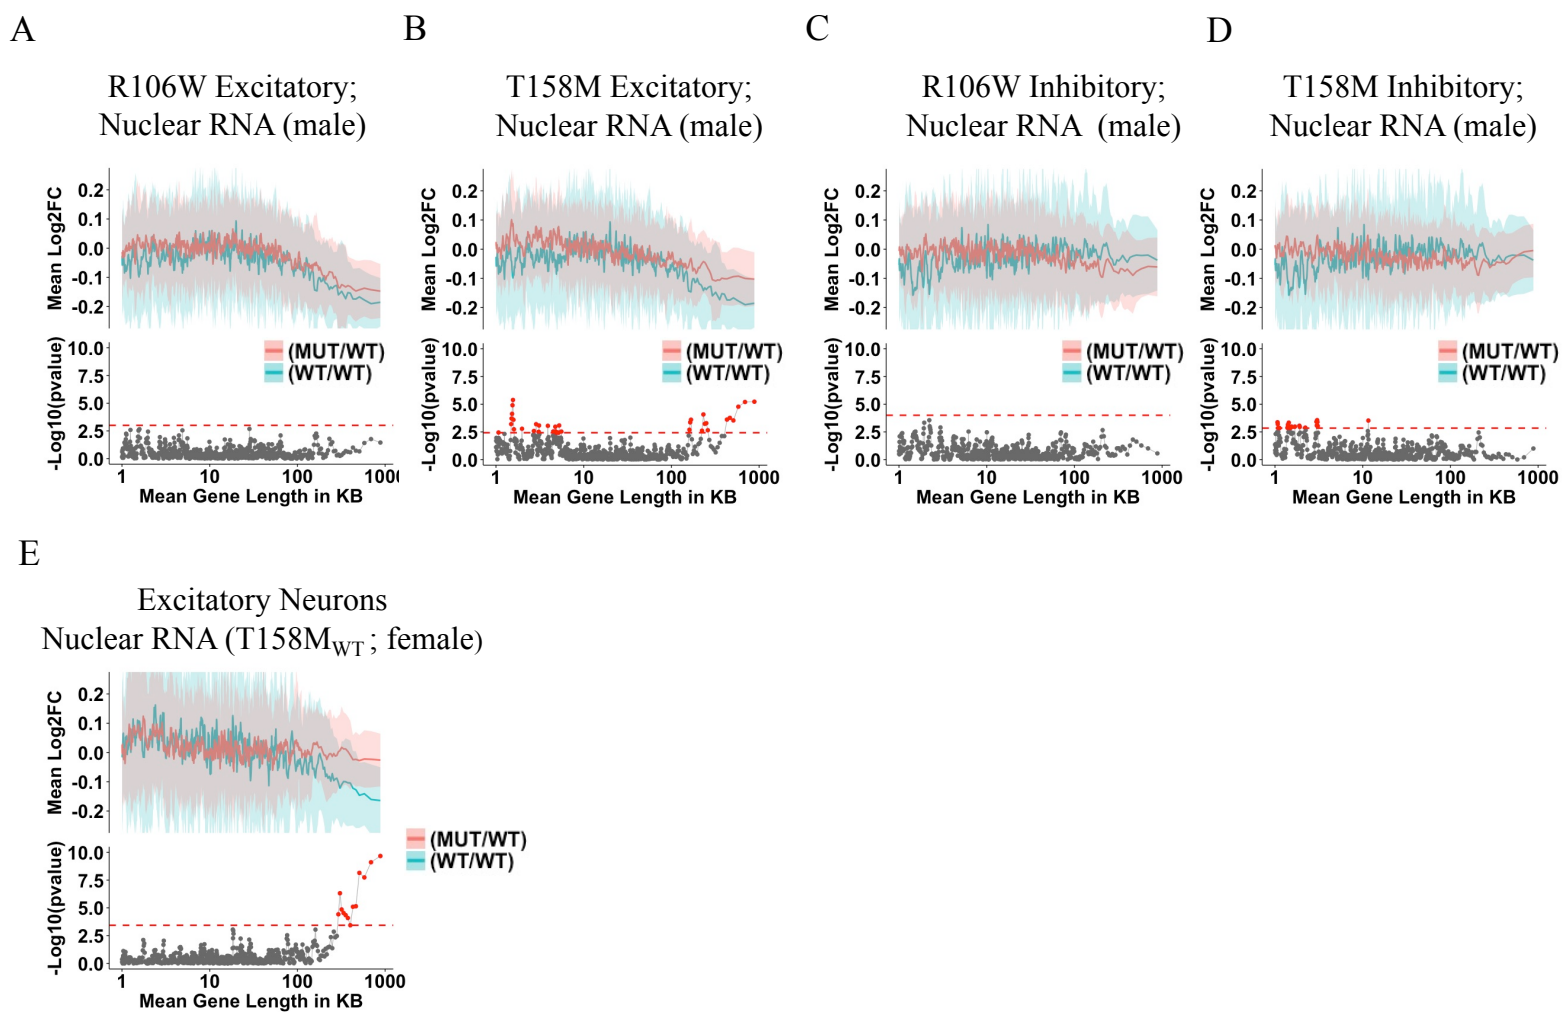**Figure S5**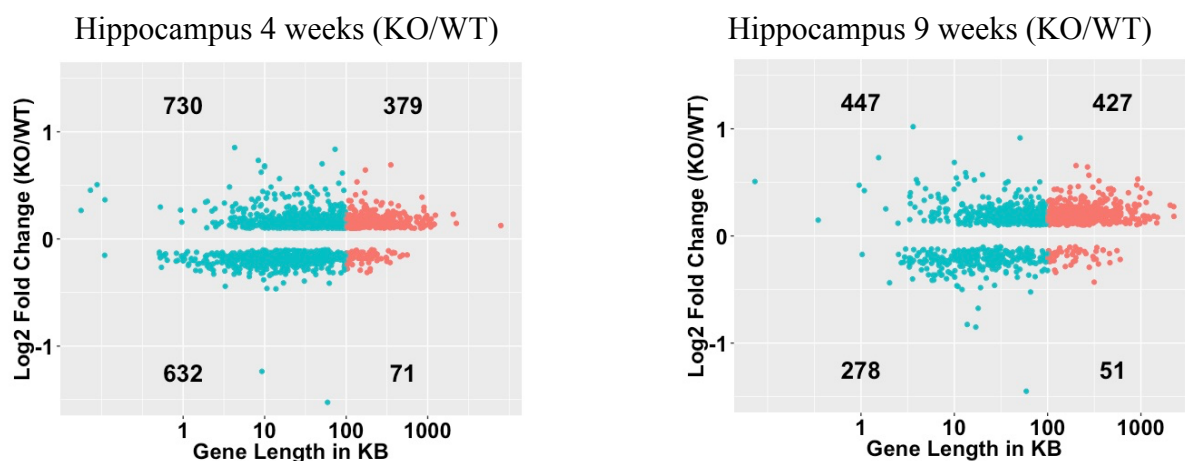

**Figure S6**

**A SEQC RNA-Seq**

bioRxiv preprint doi: <https://doi.org/10.1101/240705>; this version posted January 5, 2018. The copyright holder for this preprint (which was not certified by peer review) is the author/funder, who has granted bioRxiv a license to display the preprint in perpetuity. It is made available under aCC-BY 4.0 International license.

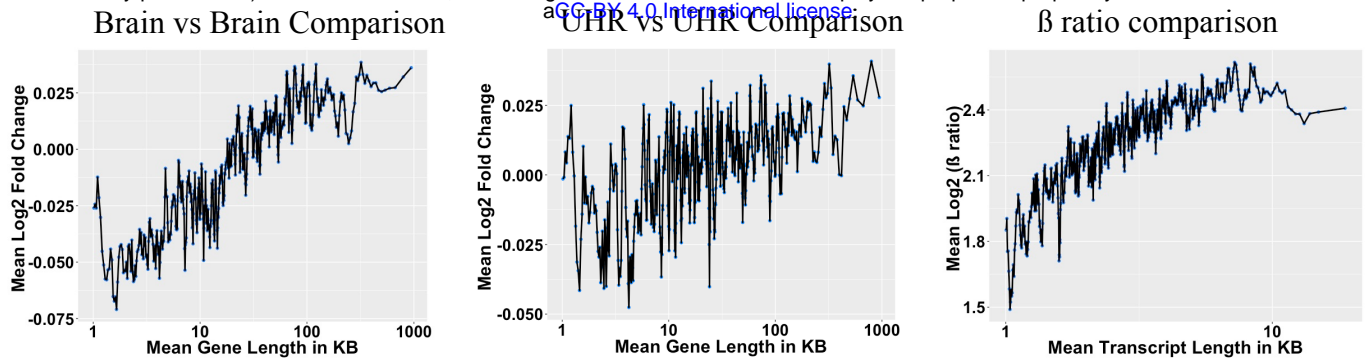

**B SEQC Array**

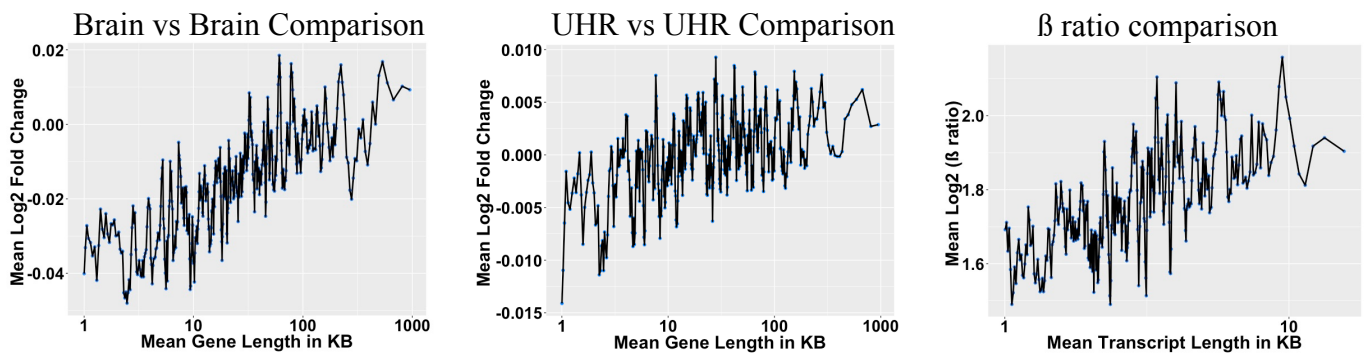

**Figure S7**

**A Total Count**

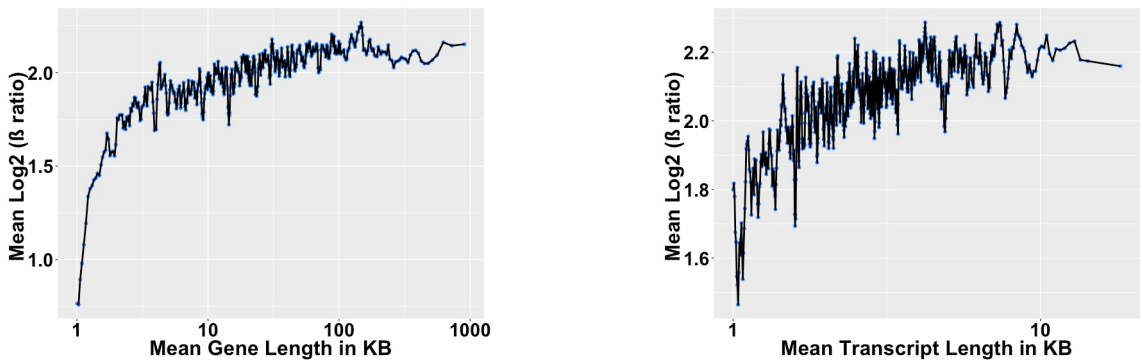

**B TMM (edgeR)**

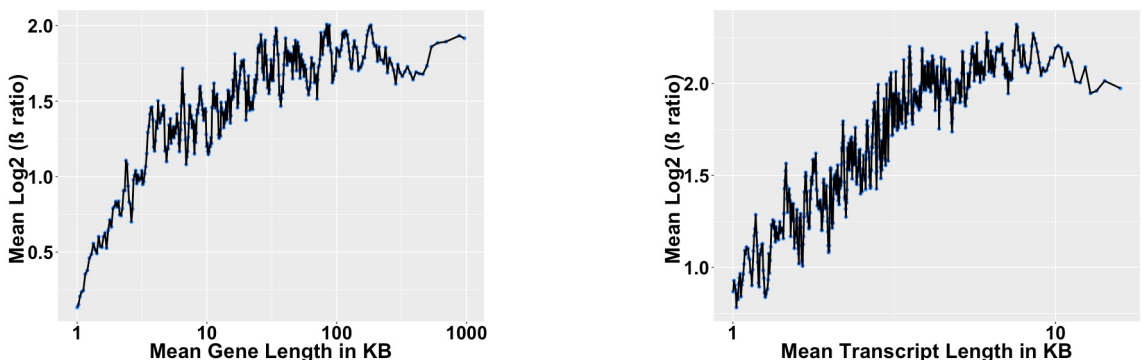

# Figure S8

bioRxiv preprint doi: <https://doi.org/10.1101/240705>; this version posted January 5, 2018. The copyright holder for this preprint (which was not certified by peer review) is the author/funder, who has granted bioRxiv a license to display the preprint in perpetuity. It is made available under aCC-BY 4.0 International license.

A

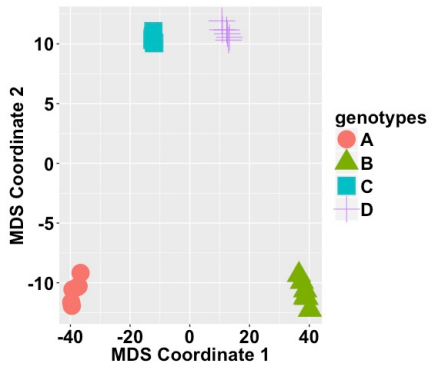

B

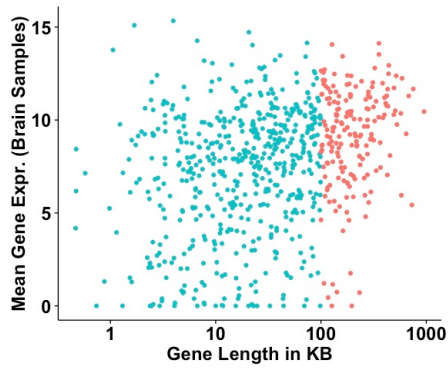

C

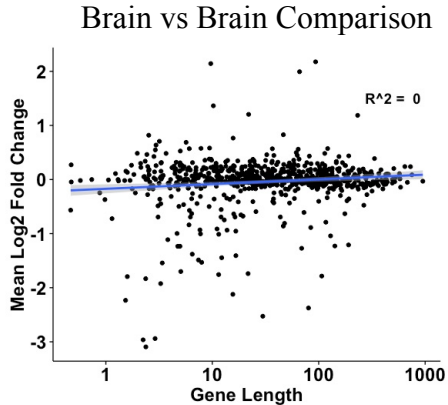

D

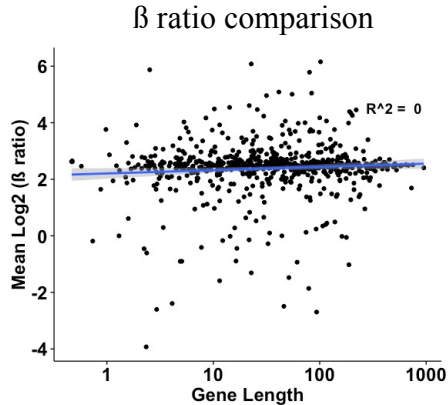



**Figure S9**

bioRxiv preprint doi: <https://doi.org/10.1101/240705>; this version posted January 5, 2018. The copyright holder for this preprint (which was not certified by peer review) is the author/funder, who has granted bioRxiv a license to display the preprint in perpetuity. It is made available under aCC-BY 4.0 International license.

**A** Technical Brain Replicates

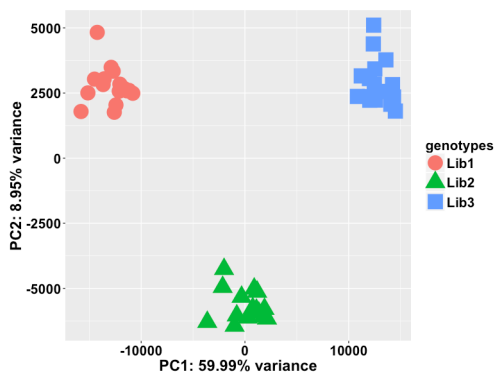

**B** Comparison of Lib1/Lib2 shows KO/WT Trend

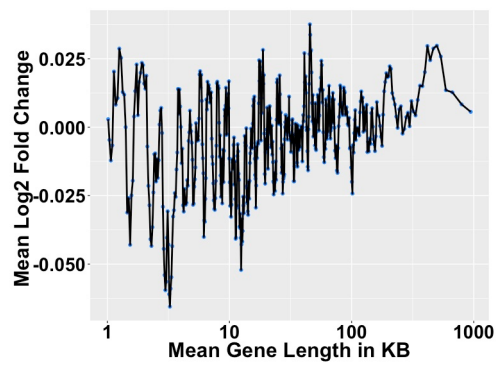

**C** Comparison of Lib3/Lib2 shows Tg/WT Trend

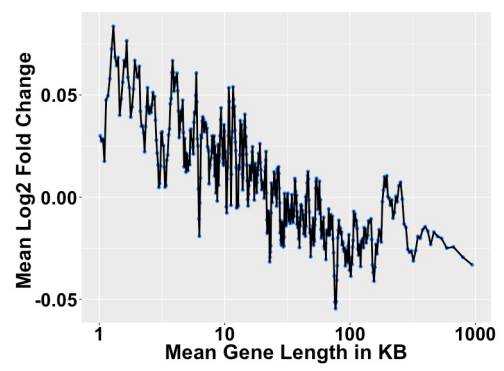

**D** Comp. of Lib1/Lib2

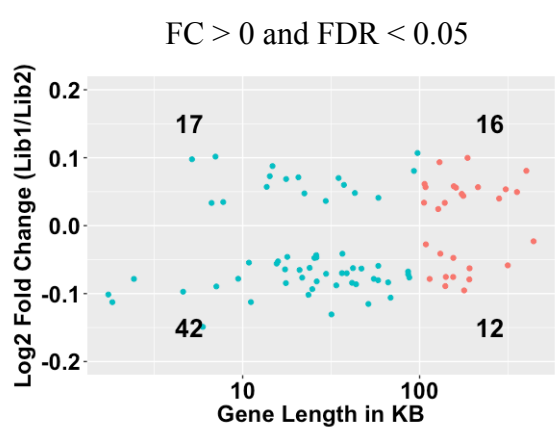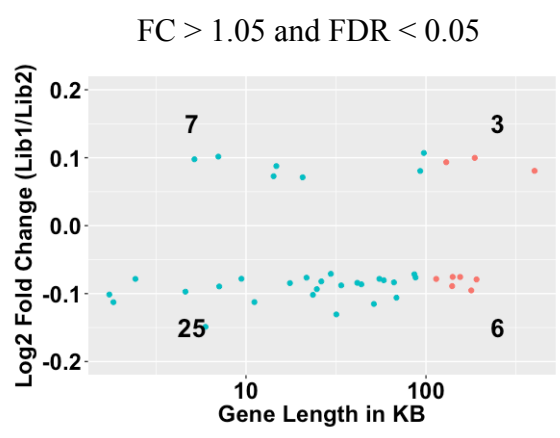

**Comp. of Lib3/Lib2**

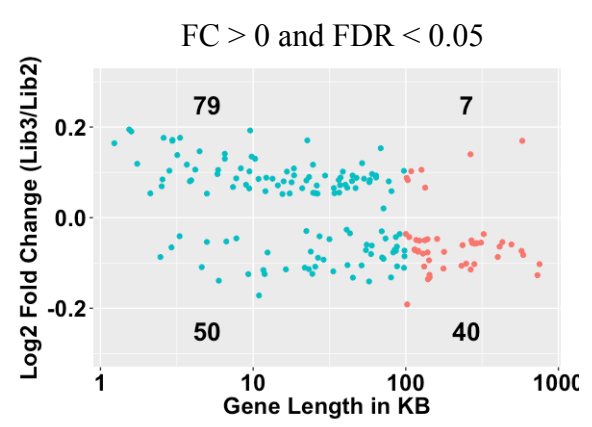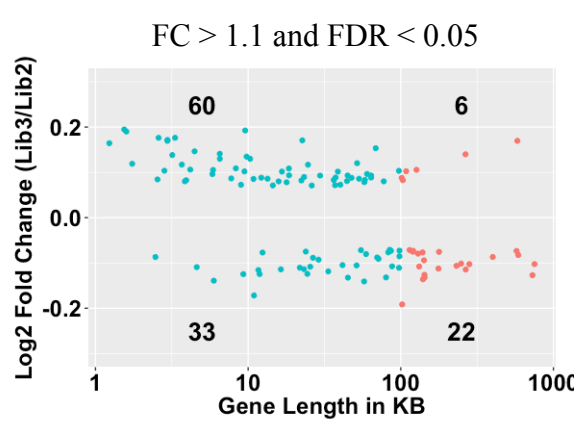

Figure S10

**A Mecp2 Cerebellum RNA-Seq KO/WT Dataset (Whole Genome)**

bioRxiv preprint doi: <https://doi.org/10.1101/240705>; this version posted January 5, 2018. The copyright holder for this preprint (which was not certified by peer review) is the author/funder, who has granted bioRxiv a license to display the preprint in perpetuity. It is made available under aCC-BY 4.0 International license.

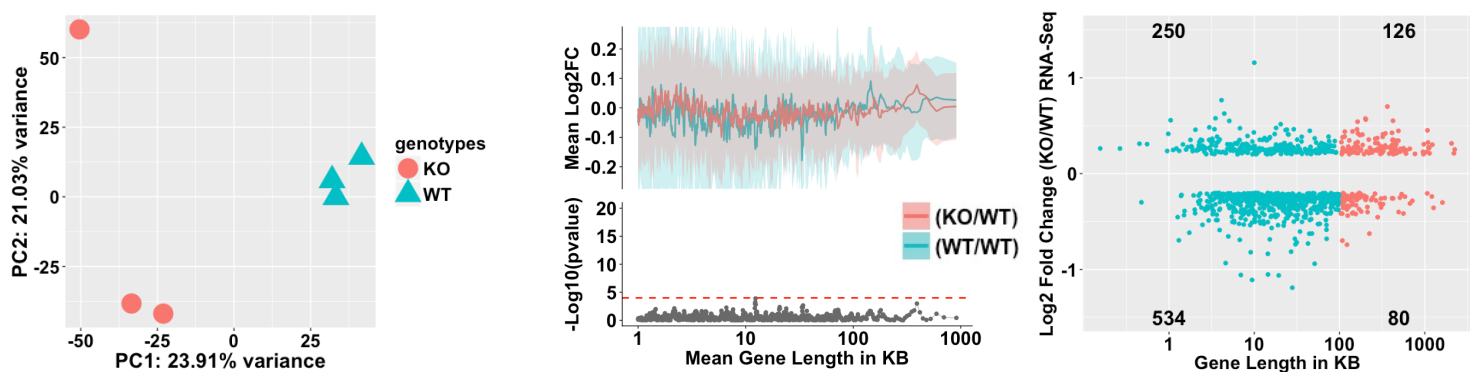

**B 750 common genes between RNA-Seq and Nanostring**

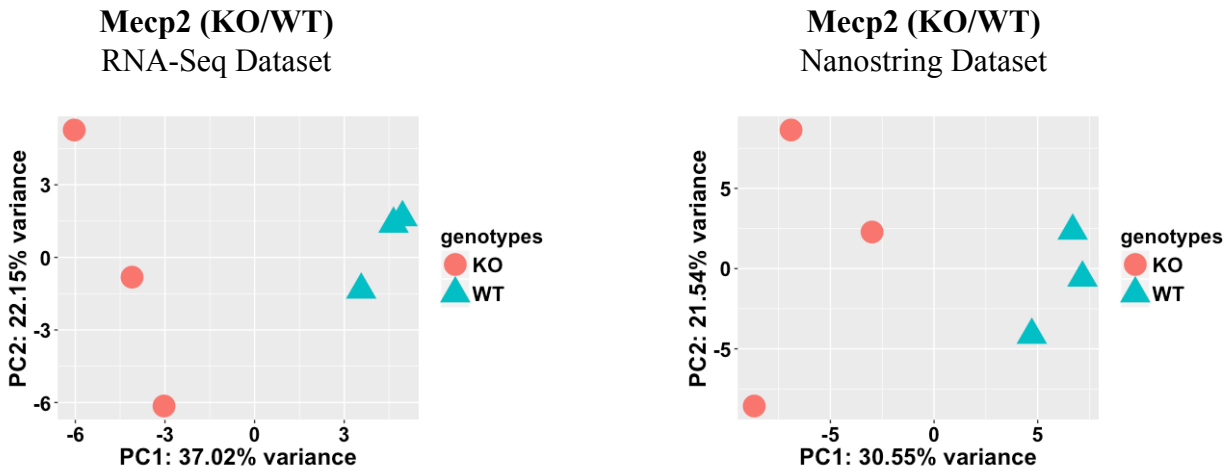

**C**

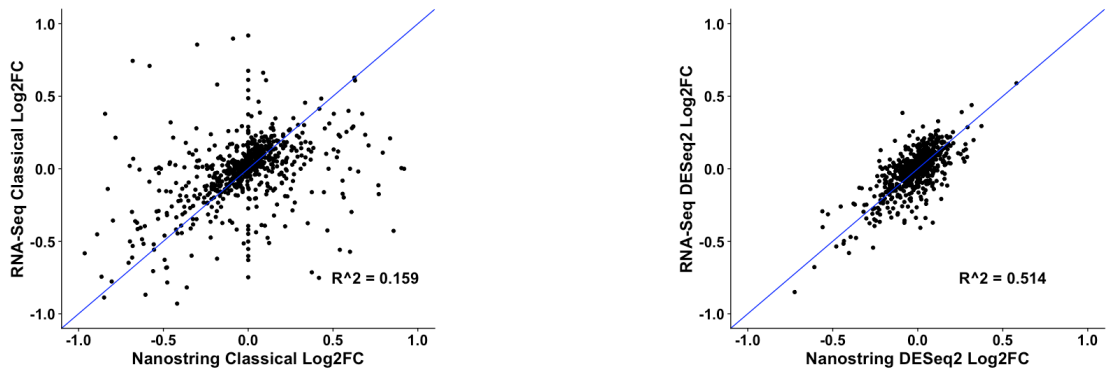

Source: https://www.biorxiv.org/content/10.1101/240705v2.full.pdf
